# Supplementary material for: Oxidative coupling of methylamine with an aminyl radical: direct amidation catalyzed by I2/TBHP with HCl
Source: Royal Society of Chemistry journal article supplement (doi:10.1039/c4cc00621f), 2014-01-01
Supplement: c4cc00621f1.pdf [file c4cc00621f1.pdf]

# Oxidative Coupling of Methylamine with Aminyl Radical: Direct Amidation Catalyzed by I<sub>2</sub>/TBHP with HCl

Lingfeng Gao, Haoming Tang and Zhiyong Wang\*

Hefei National Laboratory for Physical Science at Microscale, Joint-Lab of Green

Synthetic Chemistry and Department of Chemistry

University of Science and Technology of China

Hefei, 230026 (P. R. China)

Fax: (+86) 551-6360-3185

E-mail: zwang3@ustc.edu.cn

## *Supporting Information*

### **Contents:**

|                                               |                |
|-----------------------------------------------|----------------|
| <b>General remarks</b>                        | <b>S2</b>      |
| <b>General Experimental Section</b>           | <b>S2</b>      |
| <b>Optimization of the reaction condition</b> | <b>S</b>       |
|                                               | <b>3</b>       |
| <b>Control experiments and the analysis</b>   | <b>S4</b>      |
| <b>Characterization data of all products</b>  | <b>S6-S9</b>   |
| <b>NMR Spectra of all compounds</b>           | <b>S10-S28</b> |

**General Remarks:** All reactions were carried out in 10mL flask equipped with a condenser unless otherwise indicated. Reactions were run using Teflon<sup>TM</sup> -coated

magnetic stir bars.  $^1\text{H}$ -NMR and  $^{13}\text{C}$ -NMR were recorded on a Bruker AC-300 FT ( $^1\text{H}$ : 400 MHz,  $^{13}\text{C}$ : 100 MHz) using TMS as internal reference. The chemical shifts ( $\delta$ ) and coupling constants ( $J$ ) were expressed in ppm and Hz respectively. Infrared samples were recorded on a Perkin-Elmer 2000 FTIR spectrometer. HRMS were recorded on the TOF-HRMS-EI at the Instruments' Center for Physical Science, University of Science & Technology of China. All commercially available reagents were used as received.

## General Experimental Section

General procedure: TBHP (360 mg, 4.0 mmol, 70 wt.% cyclohexane solution) was added to a mixture of aryl-methylamine (107 mg, 109  $\mu\text{L}$ , 1.0 mmol),  $\text{I}_2$  (63.5 mg, 0.25 mmol), and DMF (1.0 mL) in a round-bottom flask equipped with a condenser. And then, 0.1 mL HCl was added into the mixture below the liquid surface. The mixture was heated at 70  $^\circ\text{C}$  for 2h, and allowed to stir at 80  $^\circ\text{C}$  for 18h. After the reaction was complete, the mixture was cooled to room temperature. Then, 3 mL saturated solution of  $\text{Na}_2\text{S}_2\text{O}_4$  was added. The mixture was extracted with ethylacetate (3  $\times$  15 mL). The combined organic phases were dried with  $\text{Na}_2\text{SO}_4$  and evaporated under vacuum. Purification of the residue by flash column chromatography (petroleum ether/ EtOAc = 2:1-1:1) afforded the desired amide.

## Optimization of the reaction condition

Table S1. Optimization of the reaction conditions <sup>a</sup>

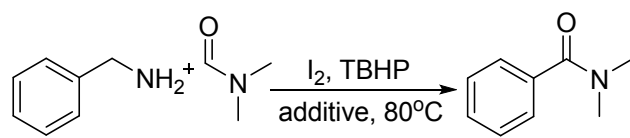

| Entry | Catalyst       | Oxidant                                      | additive <sup>c</sup>          | Yield(%) <sup>a, b</sup> |
|-------|----------------|----------------------------------------------|--------------------------------|--------------------------|
| 1     | I <sub>2</sub> | TBHP                                         | NaOH                           | <10                      |
| 2     | I <sub>2</sub> | TBHP                                         | KOH                            | <10                      |
| 3     | I <sub>2</sub> | TBHP                                         | LiOH·H <sub>2</sub> O          | <10                      |
| 4     | I <sub>2</sub> | TBHP                                         | pyridine                       | complex                  |
| 5     | I <sub>2</sub> | TBHP                                         | Et <sub>3</sub> N              | trace                    |
| 6     | I <sub>2</sub> | TBHP                                         | K <sub>2</sub> CO <sub>3</sub> | trace                    |
| 7     | I <sub>2</sub> | TBHP                                         | —                              | 38                       |
| 8     | I <sub>2</sub> | TBHP                                         | HCl <sup>c</sup>               | 54                       |
| 9     | I <sub>2</sub> | TBHP <sup>d</sup>                            | HCl                            | 46                       |
| 10    | I <sub>2</sub> | —                                            | HCl                            | n. d.                    |
| 11    | —              | TBHP                                         | HCl                            | n. d.                    |
| 12    | I <sub>2</sub> | TBHP                                         | HCl <sup>e</sup>               | 82                       |
| 13    | I <sub>2</sub> | TBHP                                         | H <sub>2</sub> SO <sub>4</sub> | 23                       |
| 14    | I <sub>2</sub> | TBHP                                         | HNO <sub>3</sub>               | 18                       |
| 15    | I <sub>2</sub> | K <sub>2</sub> S <sub>2</sub> O <sub>8</sub> | HCl                            | <5                       |
| 16    | I <sub>2</sub> | H <sub>2</sub> O <sub>2</sub>                | HCl                            | trace                    |
| 17    | I <sub>2</sub> | DTBP <sup>g</sup>                            | HCl                            | trace                    |
| 18    | I <sub>2</sub> | m-CPBA <sup>h</sup>                          | HCl                            | trace                    |
| 19    | I <sub>2</sub> | DDQ <sup>i</sup>                             | HCl                            | trace                    |

Reaction conditions: (a) The reactions were carried out with benzylamine (107.1mg, 1 mmol), DMF (1mL), I<sub>2</sub> (63.5mg, 0.25 mmol), TBHP (360mg, 4eq, 70% cyclohexane solution), at 80 °C for 18 h. (b) Yield of isolated product is based on the benzylamine. (c) Base (NaOH, KOH, LiOH, pyridine, Et<sub>3</sub>N, K<sub>2</sub>CO<sub>3</sub> respectively 0.2 mmol). 0.5mL of concentrated acid (HCl, HNO<sub>3</sub>, H<sub>2</sub>SO<sub>4</sub>). (d) Using aqueous TBHP (70%). (e) 0.1mL concentrated HCl. (g) DTBP = di-tert-butyl peroxide. (h) m-CPBA = *meta*-Chloroperoxybenzoic acid. (i) DDQ = 2,3-dichloro-5,6-dicyano-1,4-benzoquinone.

Table S2. Optimization of the ratio of I<sub>2</sub> /TBHP /HCl

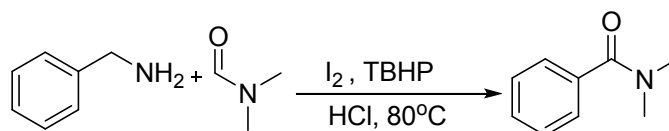

| Entry | I <sub>2</sub> (mol%) | TBHP/eq | HCl/mL | yield/% |
|-------|-----------------------|---------|--------|---------|
| 1     | 25%                   | 1       | 0.1    | 45      |
| 2     | 25%                   | 2       | 0.1    | 63      |
| 3     | 25%                   | 4       | 0.1    | 80      |
| 4     | 25%                   | 6       | 0.1    | 68      |
| 5     | 10%                   | 4       | 0.1    | 45      |
| 6     | 50%                   | 4       | 0.1    | 53      |
| 7     | 100%                  | 4       | 0.1    | 65      |
| 8     | 25%                   | 4       | 0.01   | 35      |
| 9     | 25%                   | 4       | 0.02   | 48      |
| 10    | 25%                   | 4       | 0.06   | 65      |
| 11    | 25%                   | 4       | 0.1    | 82      |
| 12    | 25%                   | 4       | 0.12   | 70      |
| 13    | 25%                   | 4       | 0.15   | 68      |
| 14    | 25%                   | 4       | 0.2    | 72      |

(a) The reactions were carried out with benzylamine (107 mg, 109  $\mu$ L, 1 mmol), DMF (1mL), I<sub>2</sub>, TBHP (70 % cyclohexane solution), at 80 °C for 18 h. (b) Yield of isolated product is based on the benzylamine.

When I<sub>2</sub> (25 mol%) was employed, the reaction gave the highest yield (Table S2, entries 3, 5, 6, 7). If I<sub>2</sub> (100 mol%) was added into the reaction mixture, the reaction became complex and gave low yield amide (Table S2, entry 7). The optimal quantity of TBHP was 4 equivalents of substrate (Table S2, entries 2, 3, 4). Because the great role of HCl in the amidation of benzylamine, detailed ratio of HCl was also researched as shown in Table S1. When 0.01mL HCl was added, the major product is cyanobenzene, only 35% **3aa** was obtained. Increasing the ratio of HCl leads to high yield. When 0.1 mL HCl was added, the reaction gave the highest yield (Table S2,

entries 7 - 13). Higher ratio HCl decreased the yield due to the partial decomposition of amide bond.

## Control experiments and the analysis

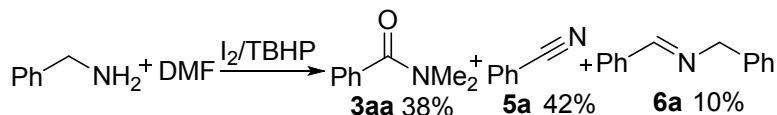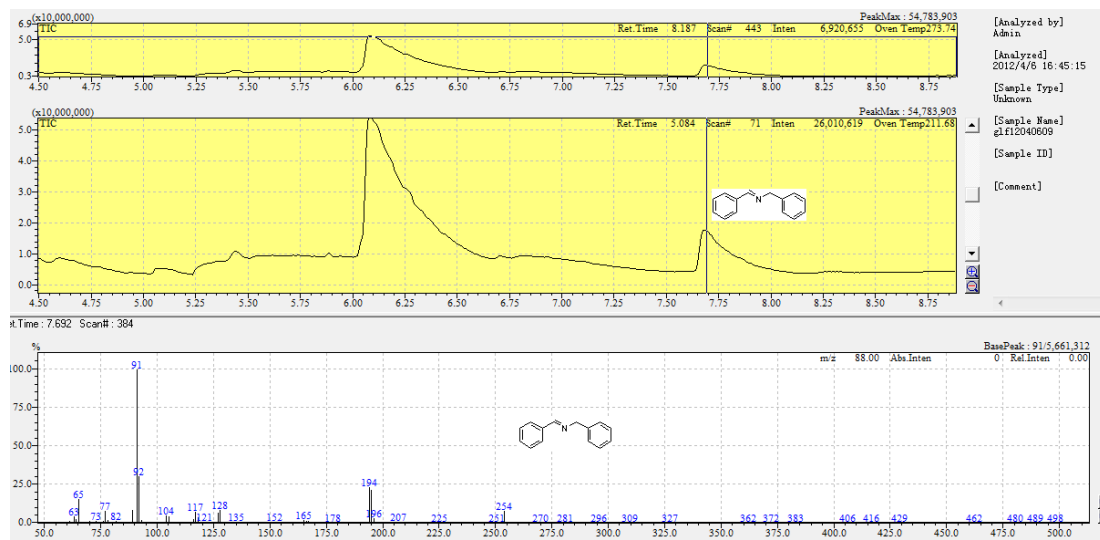

Figure S1. The GC-MS of the reaction mixture under standard condition, which show that the N-benzyl imine **6a** was detected at the 7.70 min.

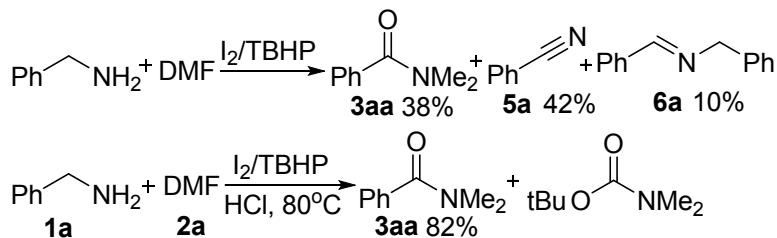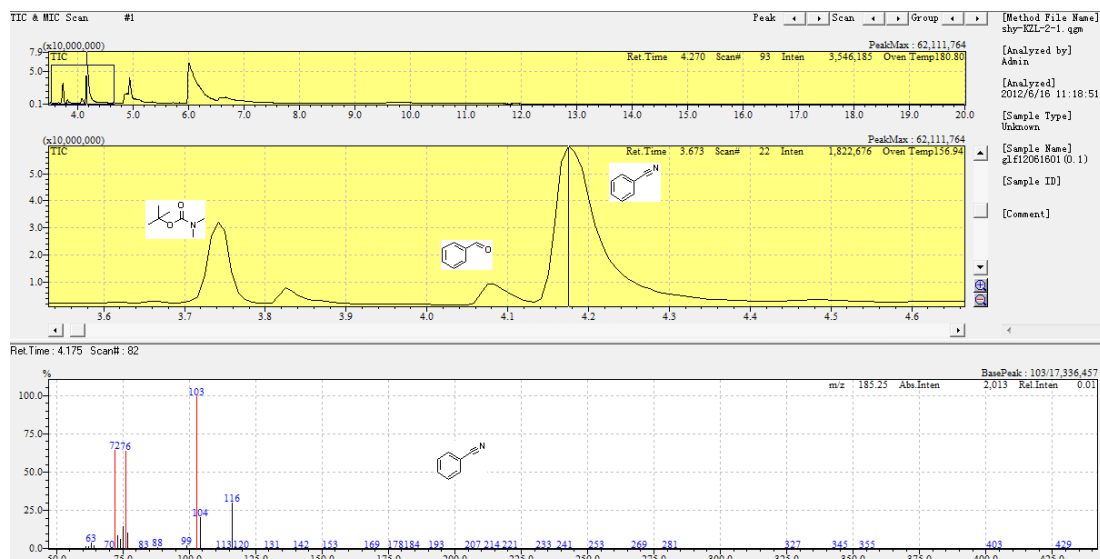

Figure S2. The GC-MS of the reaction mixture in the presence of base or in the absence of HCl, the imine **4a** major transforms to cyanobenzene **5a** was detected at the 4.1min. And then, a trace amount of benzaldehyde was also detected at 3.9 min.

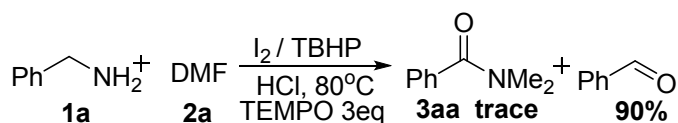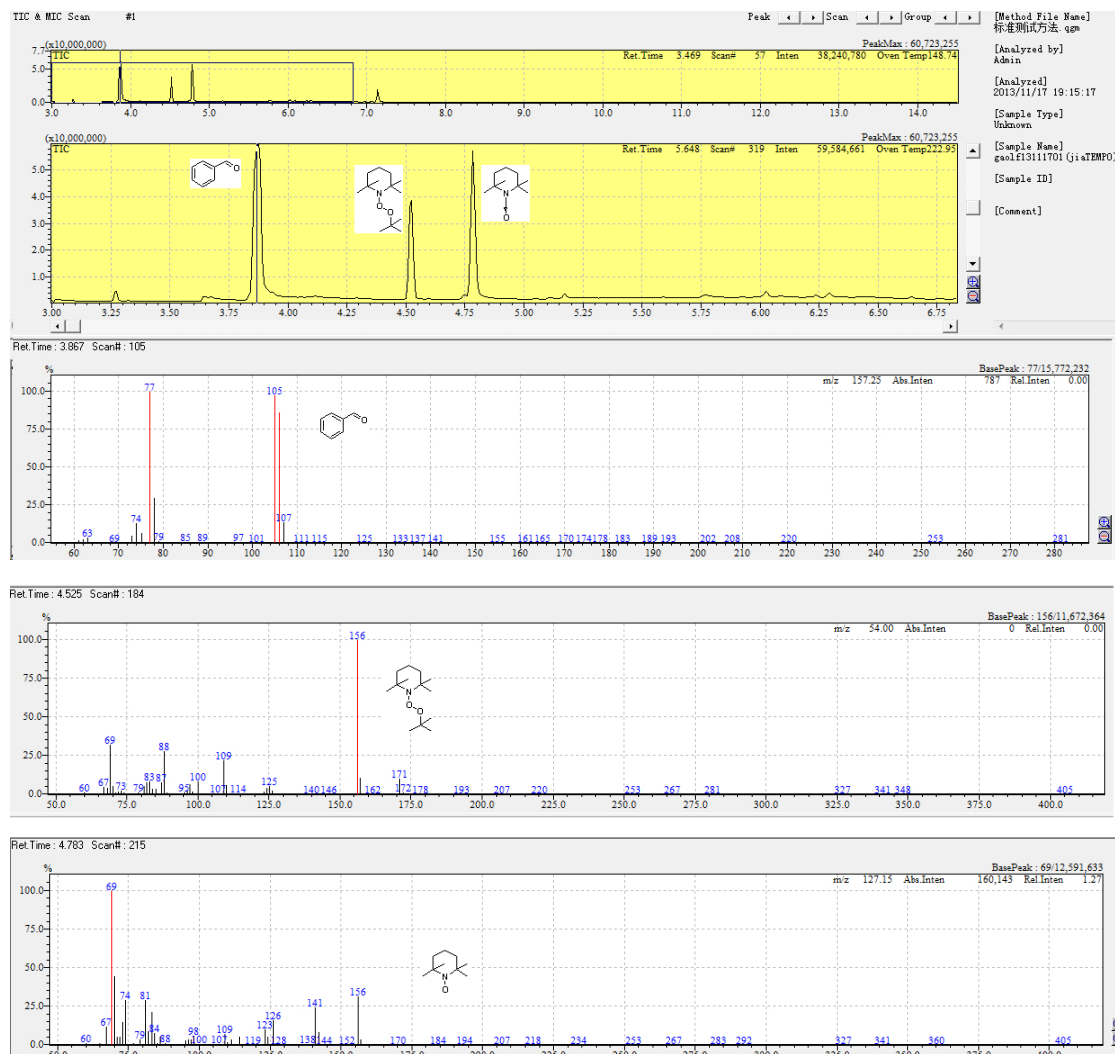

Figure S3. The GC-MS of the reaction mixture when 3 eq 2,2,6,6-Tetramethylpiperidine-1-oxyl (TEMPO) was added into the reaction, benzaldehyde was obtained in 90% yield, no any amide **3aa** was detected. And 1-(tert-butylperoxy)-2,2,6,6-tetramethylpiperidine of the cross coupling of TBHP with TEMPO was detected at the 4,49 min. There was no any amide **3aa** was detected.

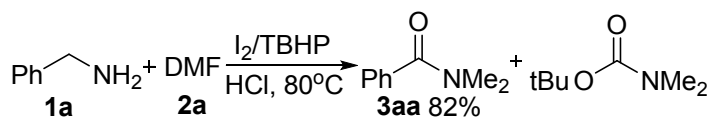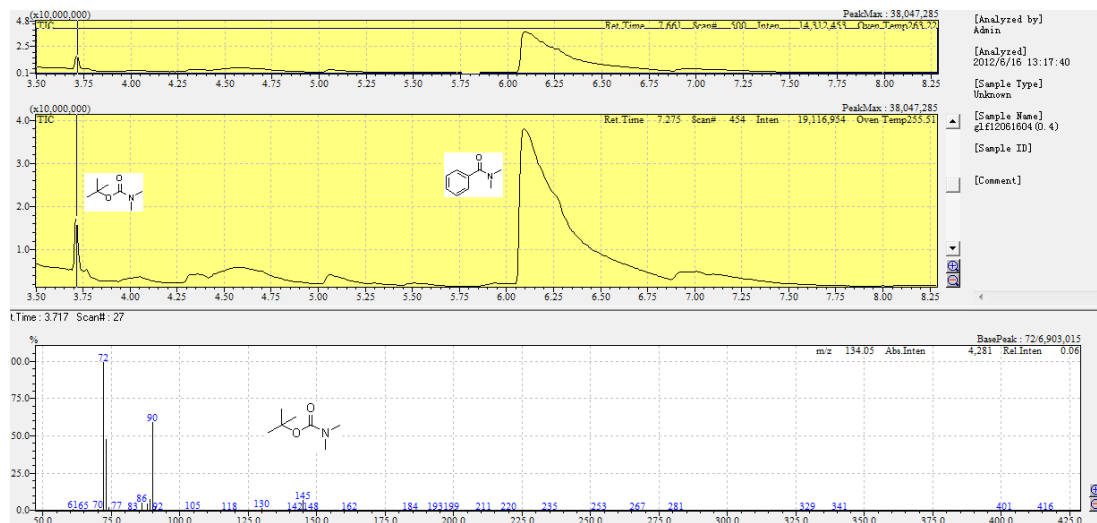

Figure S4. The GC-MS of the reaction mixture under standard condition, t-Butyl N,N-dimethylcarbamate was detected via GC-MS at the 3.75min.

### Characterization data of all products:

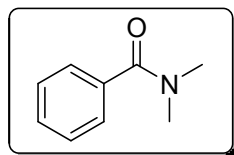

#### N,N-dimethylbenzamide **3aa**

Compound **3aa** was prepared according to the general procedure and purified by column chromatography (Petroleum Ether: EtOAc = 2:1 - 1:1) to give a white solid. The title compound was white solid.  $^1\text{H-NMR}$  (300 MHz,  $\text{CDCl}_3$ ):  $\delta$  = 3.10 (*d*, 6H), 7.40 (*s*, 5H).  $^{13}\text{C-NMR}$  (100 MHz,  $\text{CDCl}_3$ )  $\delta$  (ppm) = 35.2, 39.5, 126.9, 128.2, 129.4, 136.3, 171.5. IR (liquid film,  $\text{cm}^{-1}$ ):  $\nu$  = 3057, 2998, 2934, 2854, 1631, 1431, 1271, 708. HRMS: calcd for  $\text{C}_9\text{H}_{11}\text{NO}$ : 149.0841, found 149.0847.

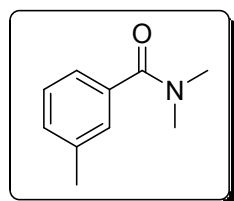

#### N,N,3-trimethylbenzamide **3ba**

Compound **3ba** was prepared according to the general procedure and purified by column chromatography (Petroleum Ether: EtOAc = 2:1-1:1) to give a white solid. The title compound was white solid.  $^1\text{H-NMR}$  (300 MHz,  $\text{CDCl}_3$ ):  $\delta$  = 2.36 (*s*, 3H), 3.10 (*d*, 6H), 7.21(*m*, 3H), 7.28 (*m*, 1H).  $^{13}\text{C-NMR}$  (75 MHz,  $\text{CDCl}_3$ )  $\delta$  (ppm) = 21.5, 35.5, 39.7, 124.1, 127.8, 128.3, 130.3, 136.5, 138.3, 172.0. HRMS: calcd for  $\text{C}_{10}\text{H}_{13}\text{NO}$ : 163.0997, found 163.1002.

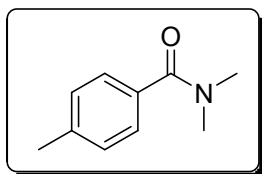

### N,N,4-trimethylbenzamide **3ca**

Compound **3ca** was prepared according to the general procedure and purified by column chromatography (Petroleum Ether: EtOAc= 2:1 - 1:1) to give a white solid. The title compound was white solid. <sup>1</sup>H-NMR (400 MHz, CDCl<sub>3</sub>): δ = 2.37 (s, 3H), 3.04 (s, 6H), 7.19 (d, *J*=8 Hz, 2H), 7.31(d, *J* =8 Hz, 2H). <sup>13</sup>C-NMR (100 MHz, CDCl<sub>3</sub>) δ (ppm) = 21.5, 36.1, 38.8, 127.3, 129.0, 133.4, 139.7, 171.9. HRMS: calcd for C<sub>10</sub>H<sub>13</sub>NO: 163.0997, found 163.1001.

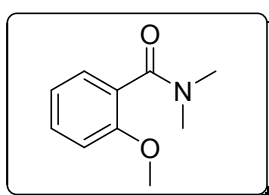

### 2-methoxy-N,N-dimethylbenzamide **3da**

Compound **3da** was prepared according to the general procedure and purified by column chromatography (Petroleum Ether: EtOAc= 2:1 - 1:1) to give a white solid. The title compound was white solid. <sup>1</sup>H-NMR (300 MHz, CDCl<sub>3</sub>): δ = 2.85 (s, 3H), 3.12 (s, 3H), 3.83 (s, 3H), 6.91 (d, *J* = 8 Hz, 1H), 6.98 (t, *J* = 8 Hz, 1 H), 7.23 (q, *J* = 8 Hz, 1H), 7.34 (m, *J* = 8 Hz, 1H). <sup>13</sup>C-NMR (100 MHz, CDCl<sub>3</sub>) δ (ppm) = 35.0, 38.5, 55.7, 111.0, 120.9, 126.0, 128.0, 130.5, 155.4, 169.6. IR (liquid film, cm<sup>-1</sup>): ν = 3057, 2998, 2934, 2854, 1631, 1431, 1271, 708. HRMS: calcd for C<sub>10</sub>H<sub>13</sub>NO<sub>2</sub>: 179.0946, found 179.0951.

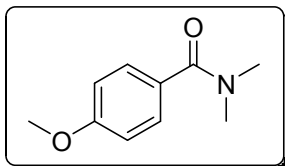

### 4-methoxy-N,N-dimethylbenzamide **3ea**

Compound **3ea** was prepared according to the general procedure and purified by column chromatography (Petroleum Ether: EtOAc= 2:1 - 1:1) to give a white solid. The title compound was white solid. <sup>1</sup>H-NMR (400 MHz, CDCl<sub>3</sub>): δ = 3.07 (s, 6H), 3.83 (s, 3H), 6.91 (m, 2H), 7.41 (d, *J*= 8Hz, 2H), 7.58 (d, *J* = 4 Hz, 1H). <sup>13</sup>C-NMR (100 MHz, CDCl<sub>3</sub>) δ (ppm) = 37.2, 38.0, 55.5, 113.7, 128.04, 128.08, 129.4, 160.8, 171.8. HRMS: calcd for C<sub>10</sub>H<sub>13</sub>NO<sub>2</sub>: 179.0946, found 179.0951.

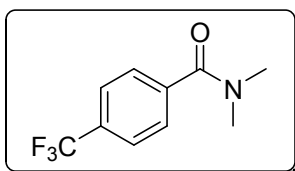

### N,N-dimethyl-4-(trifluoromethyl)benzamide **3fa**

Compound **3fa** was prepared according to the general procedure and purified by column chromatography (Petroleum Ether: EtOAc= 2:1 - 1:1) to give a white solid. The title compound was white solid. <sup>1</sup>H-NMR (300 MHz, CDCl<sub>3</sub>): δ = 2.96 (s, 3H), 3.13 (s, 3H), 7.53 (d, *J* = 8Hz, 2H), 7.67 (d, *J* = 8Hz, 2H). <sup>13</sup>C-NMR (100 MHz, CDCl<sub>3</sub>) δ (ppm) = 35.4, 39.5, 60.5, 122.5, 125.2, 125.51, 125.55, 125.58, 125.62,



127.50, 131.08, 131.40, 131.7, 132.1, 140.0, 170.2. IR (liquid film,  $\text{cm}^{-1}$ ):  $\nu = 3059, 2960, 2935, 2869, 1628, 1405, 1131, 863$ . HRMS: calcd for  $\text{C}_{10}\text{H}_{10}\text{F}_3\text{NO}$ : 217.0714, found 217.0719.

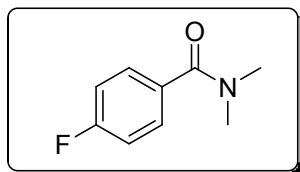

#### 4-fluoro-N,N-dimethylbenzamide **3ga**

Compound **3ga** was prepared according to the general procedure and purified by column chromatography (Petroleum Ether: EtOAc= 2:1 - 1:1) to give a white solid.

The title compound was white solid.  $^1\text{H-NMR}$  (300 MHz,  $\text{CDCl}_3$ ):  $\delta = 3.05$  (s, 6H), 7.09 (m, 2H), 7.43 (m, 2H).  $^{13}\text{C-NMR}$  (75 MHz,  $\text{CDCl}_3$ )  $\delta$  (ppm) = 38.1, 115.35, 115.37, 115.59, 129.4, 129.48, 132.21, 132.24, 162.13, 163.41, 164.41, 164.61, 165.90, 167.35, 170.81. IR (liquid film,  $\text{cm}^{-1}$ ):  $\nu = 3288, 3035, 2959, 2925, 2855, 1642, 1449, 1093$ . HRMS: calcd for  $\text{C}_9\text{H}_{10}\text{FNO}$ : 167.0746, found 167.0752.

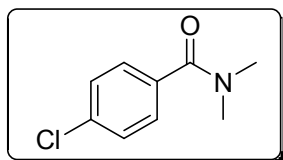

#### 4-chloro-N,N-dimethylbenzamide **3ha**

Compound **3ha** was prepared according to the general procedure and purified by column chromatography (Petroleum Ether: EtOAc= 2:1 - 1:1) to give a white solid.

The title compound was white solid.  $^1\text{H-NMR}$  (300 MHz,  $\text{CDCl}_3$ ):  $\delta = 3.04$  (s, 6H), 7.37 (s, 4H).  $^{13}\text{C-NMR}$  (100 MHz,  $\text{CDCl}_3$ )  $\delta$  (ppm) = 35.4, 39.5, 128.59, 128.62, 134.7, 135.5, 170.5. HRMS: calcd for  $\text{C}_9\text{H}_{10}\text{ClNO}$ : 183.0451, found 183.0454.

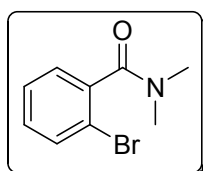

#### 2-bromo-N,N-dimethylbenzamide **3ia**

Compound **3ia** was prepared according to the general procedure and purified by column chromatography (Petroleum Ether: EtOAc= 2:1 - 1:1) to give a white solid. The title compound was white solid.

$^1\text{H-NMR}$  (300 MHz,  $\text{CDCl}_3$ ):  $\delta = 2.86$  (s, 3H), 3.14 (s, 3H), 7.24 (m, 2H), 7.36 (m, 1H), 7.58 (d,  $J = 8$  Hz, 1H).  $^{13}\text{C-NMR}$  (75 MHz,  $\text{CDCl}_3$ )  $\delta$  (ppm) = 34.8, 38.3, 119.2, 127.8, 130.3, 132.8, 138.6, 169.4. IR (liquid film,  $\text{cm}^{-1}$ ):  $\nu = 3380, 2958, 2925, 2854, 1698, 1606, 1449, 1260, 1028, 799$ . HRMS: calcd for  $\text{C}_9\text{H}_{10}\text{BrNO}$ : 226.9946, found: 226.9944.

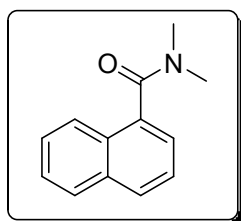

#### N,N-dimethyl-1-naphthamide **3ja**

Compound **3ja** was prepared according to the general procedure and purified by column chromatography (Petroleum Ether: EtOAc= 2:1 - 1:1) to give a white solid. The title compound was white solid.  $^1\text{H-NMR}$  (400 MHz,  $\text{CDCl}_3$ ):  $\delta = 2.81$  (s, 3H), 3.26

(s, 3H), 7.41 (d,  $J=8$  Hz 1H), 7.50 (m, 3H), 7.78 (d,  $J=8$  Hz 1H), 7.87 (d,  $J=8$  Hz 2H).  $^{13}\text{C-NMR}$  (100 MHz,  $\text{CDCl}_3$ )  $\delta$  (ppm) = 35.0, 39.0, 124.0, 125.0, 125.3, 126.5, 127.1, 128.5, 129.1, 133.6, 134.9, 171.0. HRMS: calcd for  $\text{C}_{13}\text{H}_{13}\text{NO}$ : 199.0997, found 199.1001.

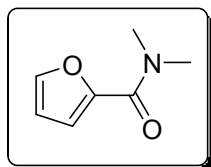

### N,N-dimethylfuran-2-carboxamide **3ka**

Compound **3ka** was prepared according to the general procedure and purified by column chromatography (Petroleum Ether: EtOAc = 2:1 - 1:1) to give a white solid. The title compound was white solid.  $^1\text{H-NMR}$  (300 MHz,  $\text{CDCl}_3$ ):  $\delta$  = 3.19 (s, 6H), 6.47 (q,  $J=6$  Hz, 1H), 6.98 (q,  $J=6$  Hz, 1H), 7.49 (q,  $J=6$  Hz, 1H).  $^{13}\text{C-NMR}$  (75 MHz,  $\text{CDCl}_3$ )  $\delta$  (ppm) = 36.6, 38.3, 111.2, 116.1, 143.8, 148.3, 160.4. HRMS: calcd for  $\text{C}_7\text{H}_9\text{NO}_2$ : 139.0633, found 139.0635.

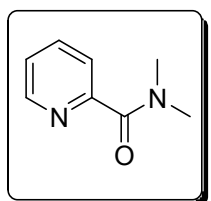

### N,N-dimethylpicolinamide **3la**

Compound **3la** was prepared according to the general procedure and purified by column chromatography (Petroleum Ether: EtOAc = 2:1 - 1:1) to give a white solid. The title compound was white solid.  $^1\text{H-NMR}$  (300 MHz,  $\text{CDCl}_3$ ):  $\delta$  = 3.08(s, 3H), 3.15(s, 3H), 7.37 (t,  $J=4$  Hz, 1H), 7.64 (d,  $J=8$  Hz, 1H), 7.83 (t,  $J=4$  Hz, 1H), 8.60 (d,  $J=4$  Hz, 1H).  $^{13}\text{C-NMR}$  (75 MHz,  $\text{CDCl}_3$ )  $\delta$  (ppm) = 35.8, 39.1, 123.7, 124.5, 137.4, 148.1, 154.3, 168.8. IR (liquid film,  $\text{cm}^{-1}$ ):  $\nu$  = 3284, 3035, 2960, 2854, 2726, 1638, 1450, 1096. HRMS: calcd for  $\text{C}_8\text{H}_{10}\text{N}_2\text{O}$ : 150.0793, found 150.0795.

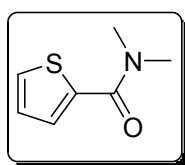

### N,N-dimethylthiophene-2-carboxamide **3ma**

Compound **3ma** was prepared according to the general procedure and purified by column chromatography (Petroleum Ether : EtOAc = 2:1 - 1:1) to give a white solid. The title compound was white solid.  $^1\text{H-NMR}$  (300 MHz,  $\text{CDCl}_3$ ):  $\delta$  = 3.18 (s, 6H), 7.04 (q,  $J=4$  Hz, 1H), 7.35 (q,  $J=4$  Hz, 1H), 7.43 (q,  $J=4$  Hz, 1H).  $^{13}\text{C-NMR}$  (100 MHz,  $\text{CDCl}_3$ )  $\delta$  (ppm) = 37.0, 39.1, 126.7, 128.8, 129.2, 138.0, 164.5. HRMS: calcd for  $\text{C}_7\text{H}_9\text{NOS}$ : 155.0405, found 155.0410.

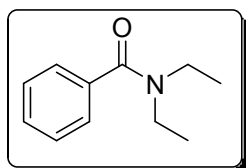

### N,N-diethylbenzamide **3an**

Compound **3an** was prepared according to the general procedure and purified by column chromatography (Petroleum Ether: EtOAc = 2:1 - 1:1) to give a white solid. The title compound was white solid.  $^1\text{H-NMR}$  (400 MHz,  $\text{CDCl}_3$ ):  $\delta$  = 1.18 (m, 6 H), 3.26 (s, 6H), 3.54 (d,

4H), 7.37 (s, 5H).  $^{13}\text{C-NMR}$  (100 MHz,  $\text{CDCl}_3$ )  $\delta$  (ppm) = 12.9, 14.1, 39.4, 43.3, 126.2, 128.3, 129.1, 137.0, 171.4. IR (liquid film,  $\text{cm}^{-1}$ ):  $\nu$  = 3057, 2998, 2934, 2854, 1631, 1431, 1271, 706. HRMS: calcd for  $\text{C}_{11}\text{H}_{15}\text{NO}$ : 177.1154, found 177.1158.

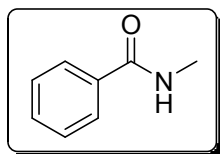

### N-methylbenzamide **3ao**

Compound **3ao** was prepared according to the general procedure and purified by column chromatography (Petroleum Ether: EtOAc = 2:1 - 1:1) to give a white solid. The title compound was white solid.  $^1\text{H-NMR}$  (300 MHz,  $\text{CDCl}_3$ ):  $\delta$  = 3.02 (d,  $J$  = 4 Hz, 3H), 6.16 (s, 1H), 7.43 (m, 2H), 7.50 (q,  $J$  = 4 Hz, 1H), 7.76 (d,  $J$  = 4 Hz, 1H).  $^{13}\text{C-NMR}$  (75 MHz,  $\text{CDCl}_3$ )  $\delta$  (ppm) = 27.0, 126.9, 128.7, 131.5, 134.8, 168.4. HRMS: calcd for  $\text{C}_8\text{H}_9\text{NO}$ : 135.0684, found 135.0686.

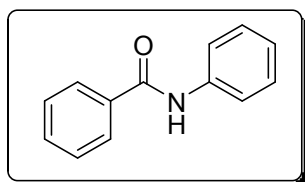

### N-phenylbenzamide **3ap**

Compound **3ap** was prepared according to the general procedure and purified by column chromatography (Petroleum Ether: EtOAc = 2:1 - 1:1) to give a white solid. The title compound was white solid.  $^1\text{H-NMR}$  (300 MHz,  $\text{CDCl}_3$ ):  $\delta$  = 7.09 (m, 2H), 7.15 (m, 1H), 7.32 (m, 3H), 7.53 (d,  $J$  = 8 Hz, 1H), 7.62 (q,  $J$  = 8 Hz, 1H), 7.86 (s, 1H), 8.35 (d,  $J$  = 4 Hz, 1H), 8.69 (d,  $J$  = 4 Hz, 1H).  $^{13}\text{C-NMR}$  (75 MHz,  $\text{CDCl}_3$ )  $\delta$  (ppm) = 120.4, 124.7, 127.2, 128.8, 129.2, 131.9, 135.1, 138.1, 166.0. IR (liquid film,  $\text{cm}^{-1}$ ):  $\nu$  = 3455, 3344, 3051, 2960, 2926, 2853, 1656, 1439, 1074, 750. HRMS: calcd for  $\text{C}_{13}\text{H}_{11}\text{NO}$ : 197.0841, found 197.0847.

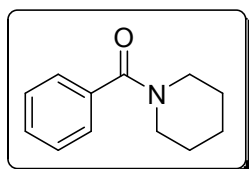

### phenyl(piperidin-1-yl)methanone **3aq**

Compound **3aq** was prepared according to the general procedure and purified by column chromatography (Petroleum Ether: EtOAc = 2:1 - 1:1) to give a white solid. The title compound was white solid.  $^1\text{H-NMR}$  (300 MHz,  $\text{CDCl}_3$ ):  $\delta$  = 1.59 (s, 3H), 1.67 (d, 6H), 3.53 (s, 4H), 7.39 (s, 5H).  $^{13}\text{C-NMR}$  (100 MHz,  $\text{CDCl}_3$ )  $\delta$  (ppm) = 24.7, 26.2, 44.5, 48.1, 126.9, 128.5, 129.5, 136.4, 170.4. IR (liquid film,  $\text{cm}^{-1}$ ):  $\nu$  = 3254, 3056, 2934, 2855, 1632, 1432, 1277, 1108, 706. HRMS: calcd for  $\text{C}_{12}\text{H}_{15}\text{NO}$ : 189.1154, found 189.1156.

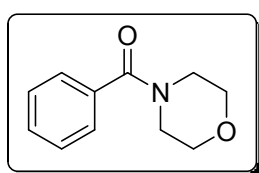

### morpholino(phenyl)methanone **3ar**

Compound **3ar** was prepared according to the general procedure and purified by column chromatography (Petroleum Ether: EtOAc = 2:1 - 1:1) to give a white solid. The title

compound was white solid.  $^1\text{H-NMR}$  (300 MHz,  $\text{CDCl}_3$ ):  $\delta = 3.47, 3.69$  (8H), 7.41 (m, 5H).  $^{13}\text{C-NMR}$  (75 MHz,  $\text{CDCl}_3$ )  $\delta$  (ppm) = 42.7, 48.2, 66.9, 127.1, 128.5, 129.9, 135.3, 170.4. IR (liquid film,  $\text{cm}^{-1}$ ):  $\nu = 3361, 2959, 2922, 2853, 1634, 1428, 1113$ . HRMS: calcd for  $\text{C}_{11}\text{H}_{13}\text{NO}_2$ : 191.0946, found 191.0949.

## NMR Spectra of all compounds

$^1\text{H NMR}$ ,  $^{13}\text{C NMR}$  of 3aa:

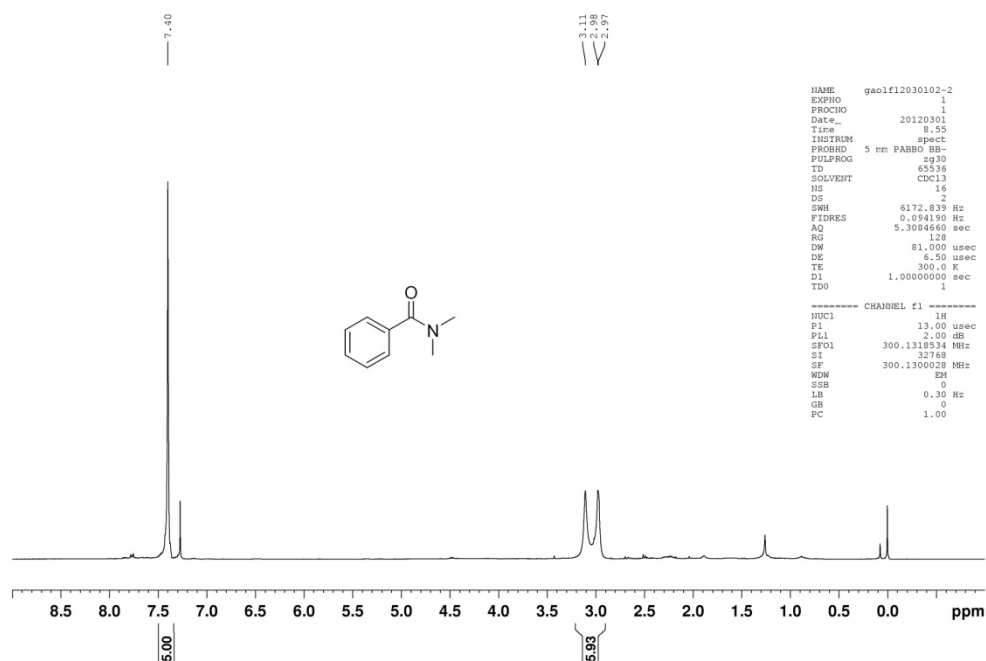

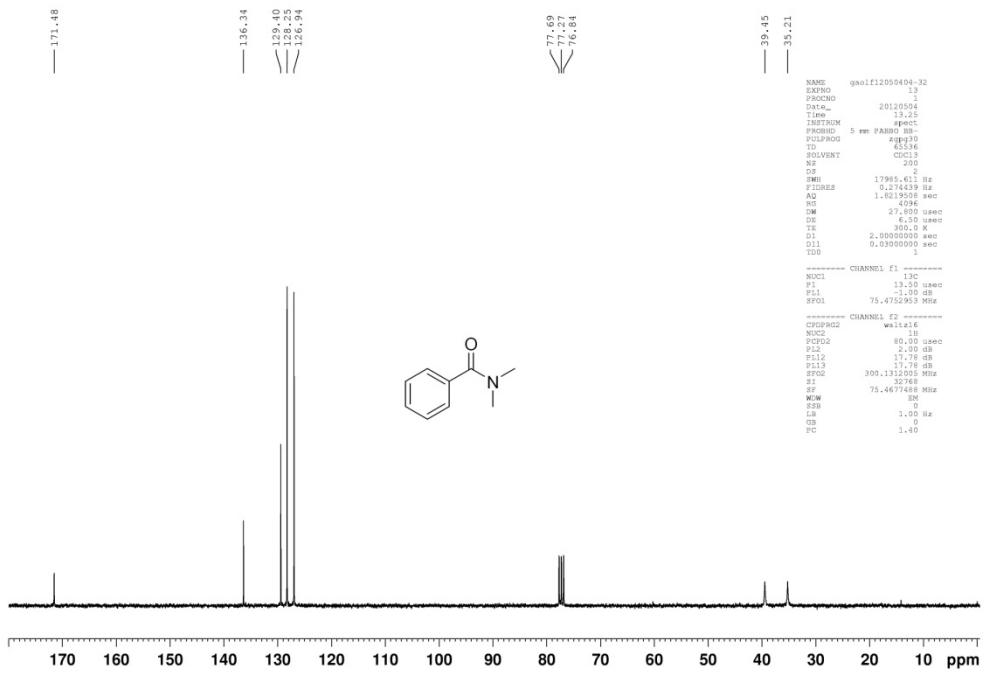

<sup>1</sup>H NMR, <sup>13</sup>C NMR of 3ba:

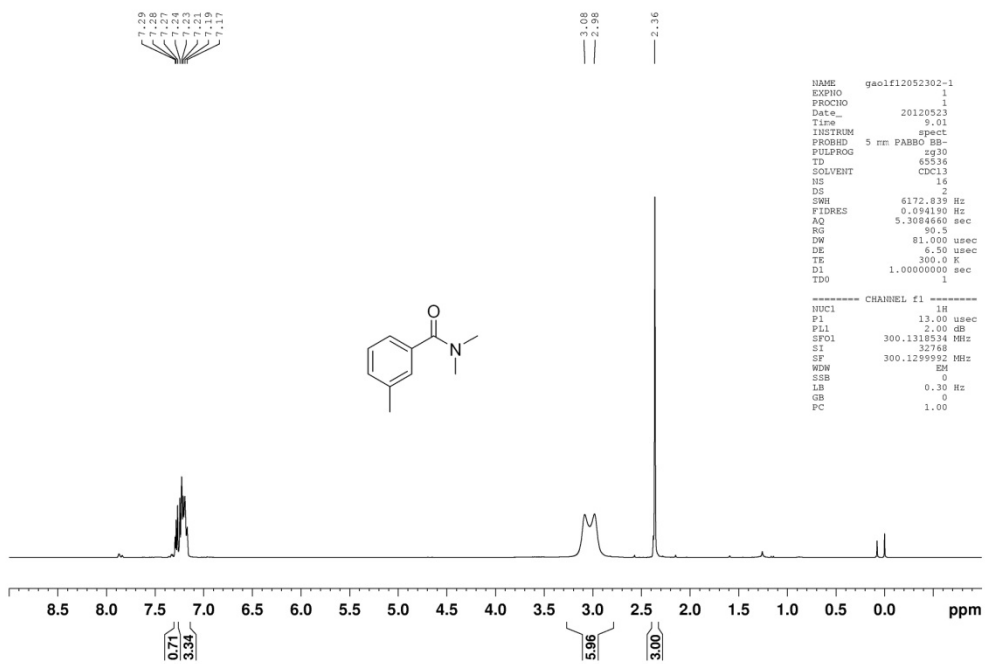

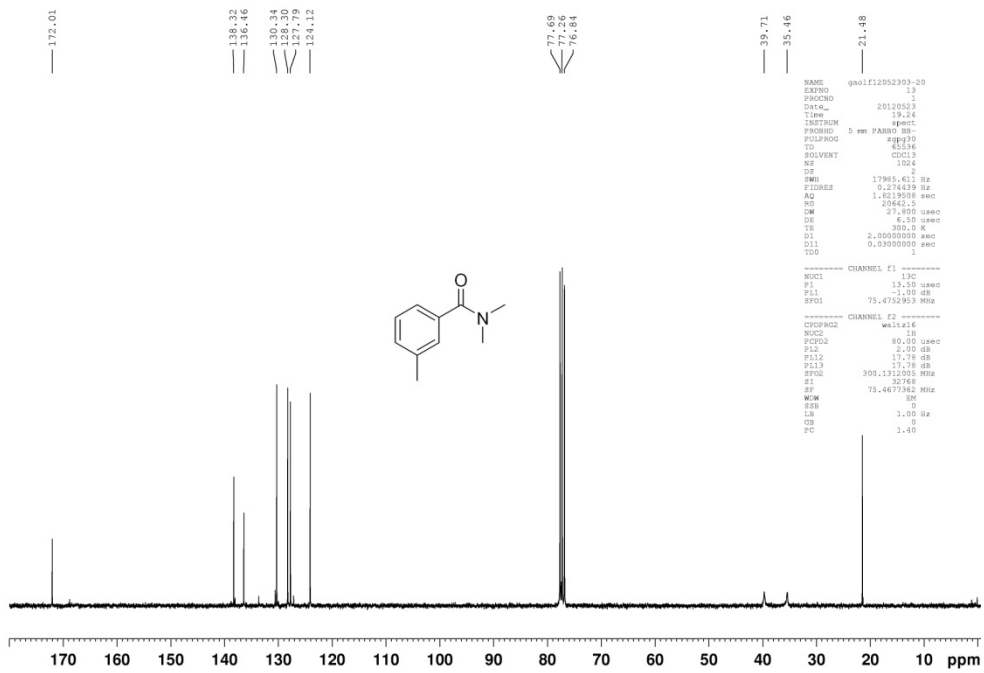

```

NAME      gaolf12052303-20
EXPNO    13
PROCNO   1
Date_    20120523
Time     13.24
INSTRUM  spect
PROBHD   5 mm PABBO BB-
PULPROG  zgpg30
TD        65536
SOLVENT  CDCl3
NS        2
DS        2
SWH       17905.613 Hz
FIDRES   0.274439 Hz
AQ        1.4213008 sec
RG        20642.5
DM        27.900 usec
DE        6.50 usec
TE        300.2 K
D1        2.0000000 sec
D11       0.0300000 sec
TD0       1
----- CHANNEL f1 -----
NUC1      13C
P1        13.00 usec
PL1       -1.00 dB
SFO1      75.4752933 MHz
----- CHANNEL f2 -----
CPCPRG2  waltz16
NUC2      1H
PCPD2    80.00 usec
PL2       2.00 dB
PL12     17.78 dB
PL13     17.78 dB
SFO2     300.1312093 MHz
SI        32768
SF        75.4677862 MHz
WDW       EM
SSB       0
LB        0.30 Hz
GB        0
PC        1.40
  
```

$^1\text{H}$  NMR,  $^{13}\text{C}$  NMR of 3ca:

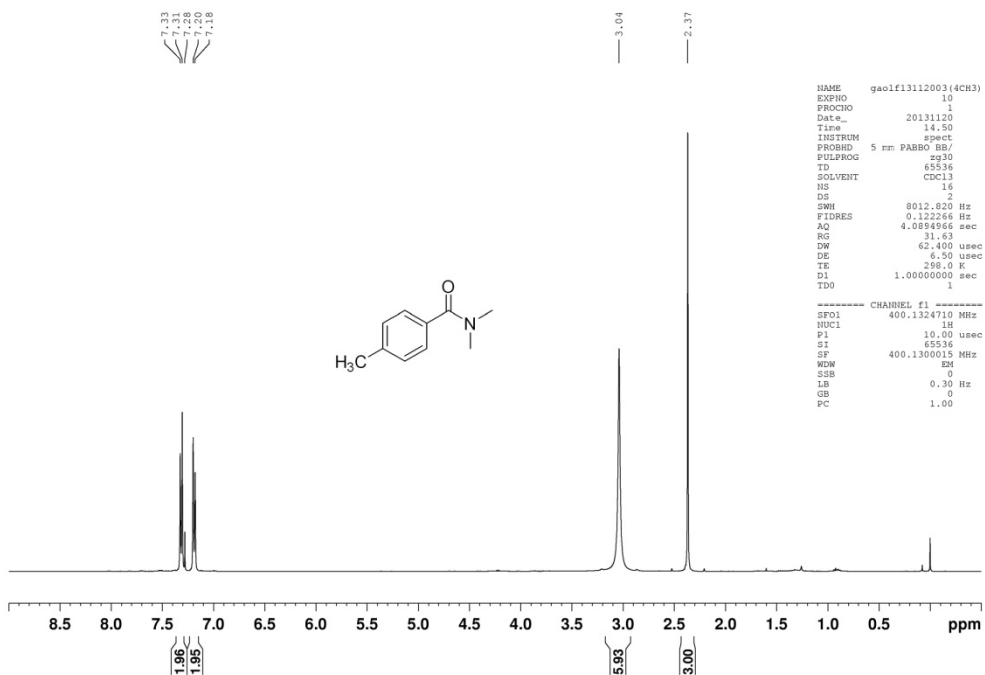

```

NAME      gaolf13112003(4CH3)
EXPNO    10
PROCNO   1
Date_    20131120
Time     14.50
INSTRUM  spect
PROBHD   5 mm PABBO BB/
PULPROG  zg30
TD        65536
SOLVENT  CDCl3
NS        16
DS        2
SWH       8012.820 Hz
FIDRES   0.122266 Hz
AQ        4.0894966 sec
RG        31.63
DM        62.400 usec
DE        6.50 usec
TE        298.0 K
D1        1.0000000 sec
TD0       1
----- CHANNEL f1 -----
SFO1     400.1324710 MHz
NUC1      1H
P1        10.00 usec
PL1       0
SI        65536
SF        400.1300015 MHz
WDW       EM
SSB       0
LB        0.30 Hz
GB        0
PC        1.00
  
```

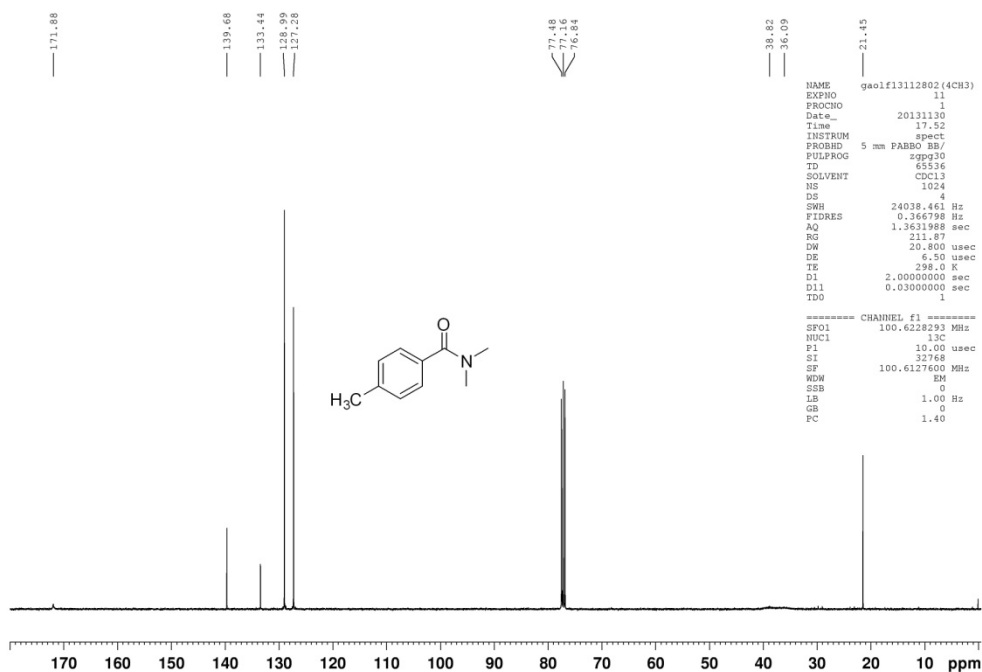

**<sup>1</sup>H NMR, <sup>13</sup>C NMR of 3da:**

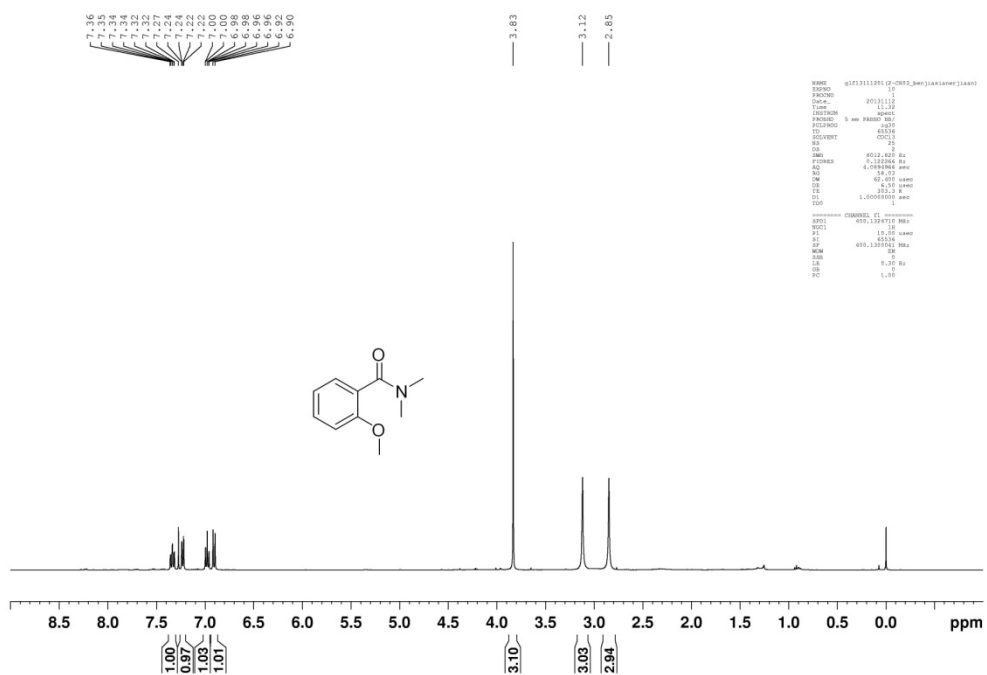

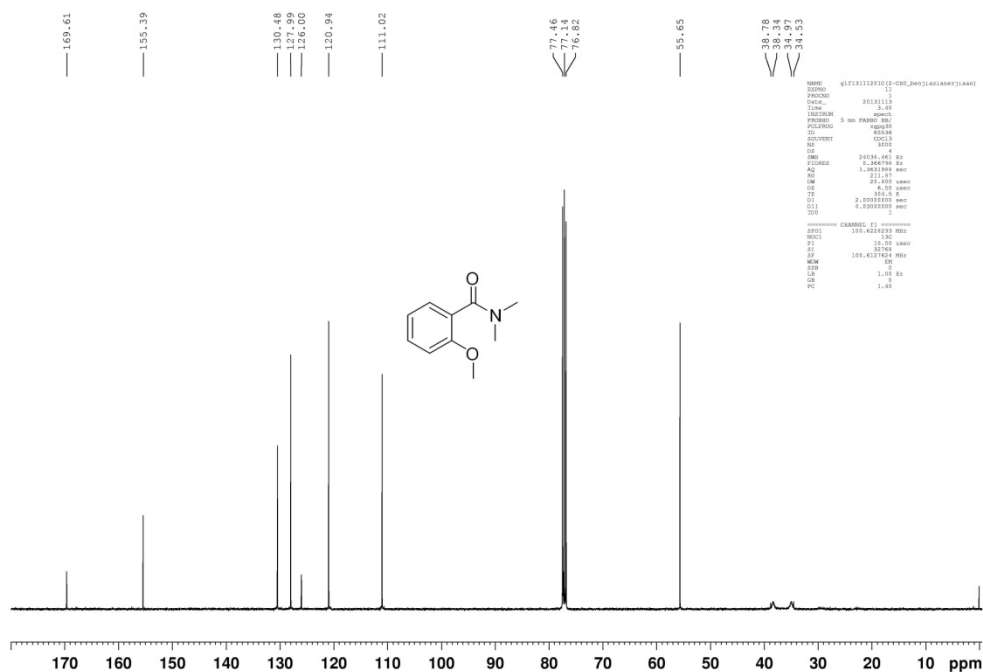

<sup>1</sup>H NMR, <sup>13</sup>C NMR of 3ea:

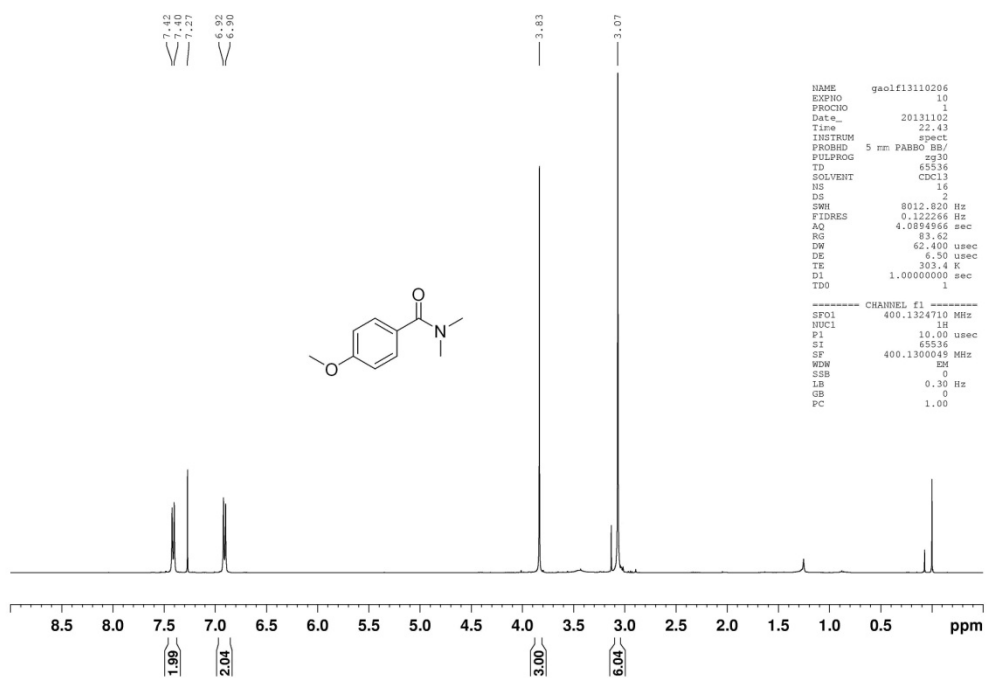

```

NAME      gaolf13110206
EXPNO     10
PROCNO    1
Date_     20131102
Time      22.43
INSTRUM   spect
PROBHD    5 mm PABBO BB/
PULPROG   zg30
TD         65536
SOLVENT   CDCl3
NS         16
DS         2
SWH        8012.820 Hz
FIDRES     0.122266 Hz
AQ          4.0894966 sec
RG          83.62
DM          62.400 usec
DE          6.50 usec
TE         303.4 K
D1         1.0000000 sec
TD0        1

----- CHANNEL f1 -----
SF01      400.1324710 MHz
NUC1       1H
P1         10.00 usec
SI         65536
SF         400.1300049 MHz
WDW        EM
SSB        0
LB         0.30 Hz
GB         0
PC         1.00
  
```



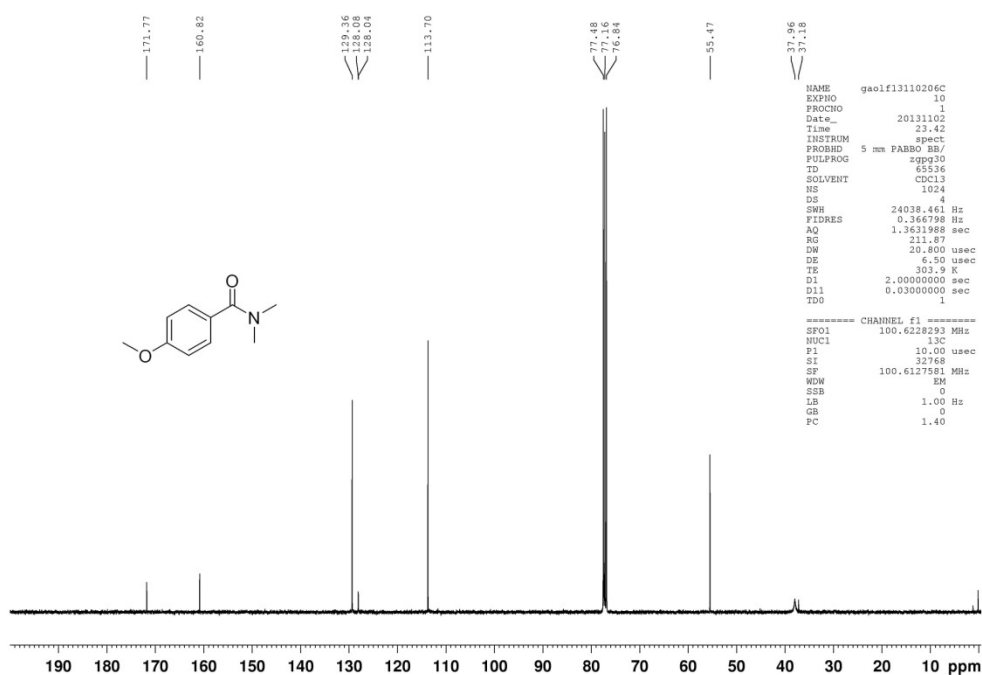

```

NAME      gso1f13110206c
EXPNO     10
PROCNO    1
Date_     20131102
Time      23.42
INSTRUM   spect
PROBHD    5 mm PABBO BB/
PULPROG   zgpg30
TD         65536
SOLVENT   CDCl3
NS         1024
DS         4
SWH        24038.461 Hz
FIDRES     0.366798 Hz
AQ         1.3631988 sec
RG         211.87
DW         20.800 usec
DE         6.50 usec
TE         303.9 K
D1         2.0000000 sec
D11        0.0300000 sec
TDO        1
===== CHANNEL f1 =====
SF01      100.628293 MHz
NUC1       13C
P1         10.00 usec
SI         32768
SF         100.6127581 MHz
WDW        EM
SSB        0
LB         1.00 Hz
GB         0
PC         1.40

```

<sup>1</sup>H NMR, <sup>13</sup>C NMR of 3fa:

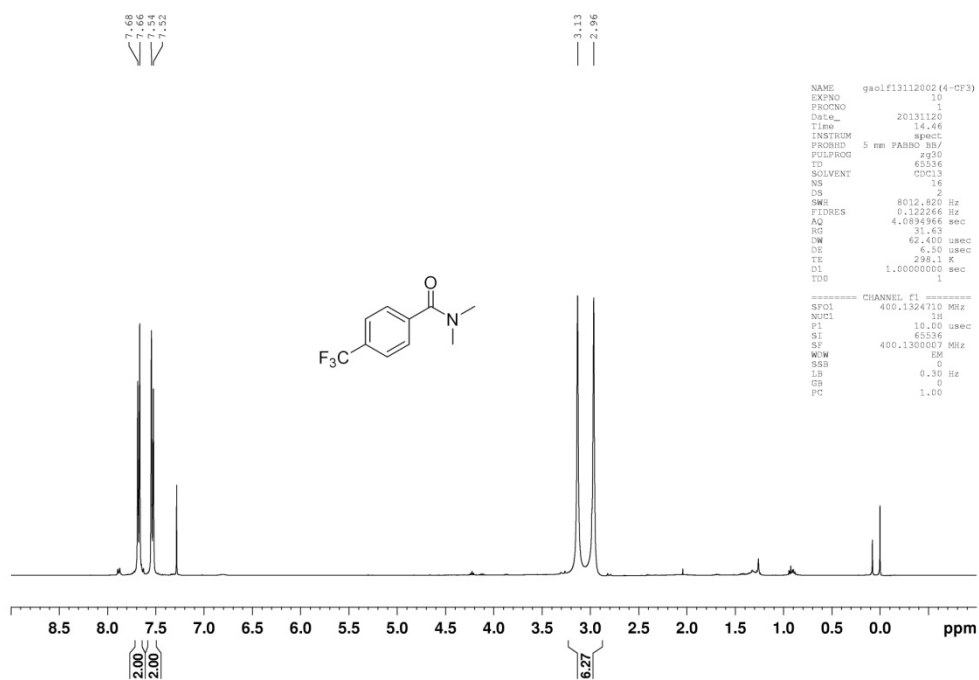

```

NAME      gso1f13112002(4-CF3)
EXPNO     10
PROCNO    1
Date_     20131120
Time      14.46
INSTRUM   spect
PROBHD    5 mm PABBO BB/
PULPROG   zg30
TD         65536
SOLVENT   CDCl3
NS         16
DS         2
SWH        8012.820 Hz
FIDRES     0.122266 Hz
AQ         4.0894966 sec
RG         31.63
DW         62.400 usec
DE         6.50 usec
TE         298.1 K
D1         1.0000000 sec
TDO        1
===== CHANNEL f1 =====
SF01      400.1324710 MHz
NUC1       1H
P1         10.00 usec
SI         65536
SF         400.1300007 MHz
WDW        EM
SSB        0
LB         0.30 Hz
GB         0
PC         1.00

```

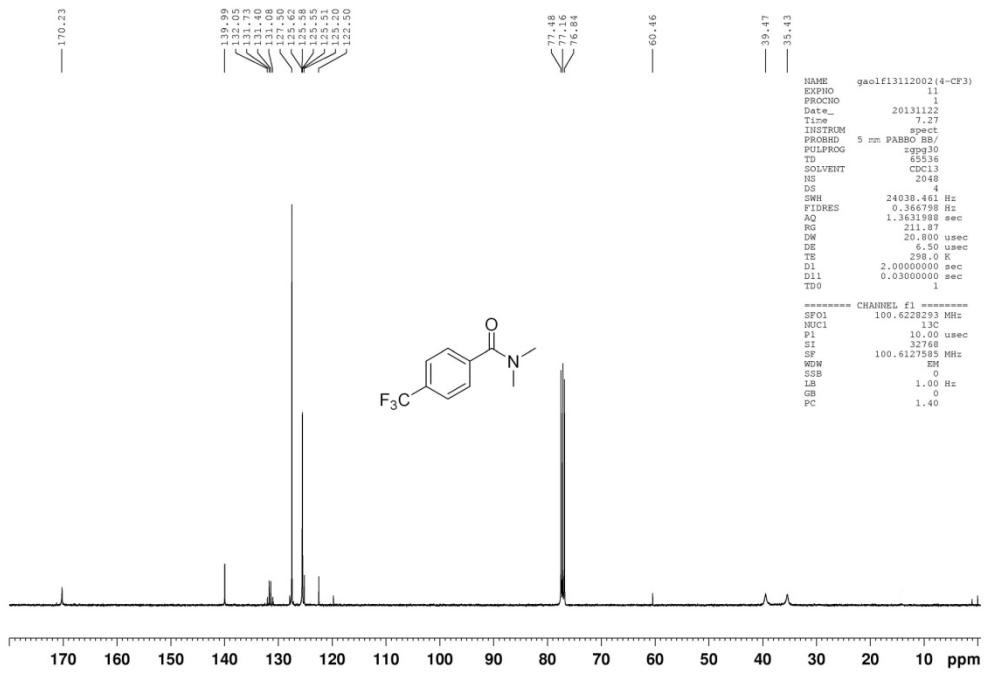

<sup>1</sup>H NMR, <sup>13</sup>C NMR of 3ga:

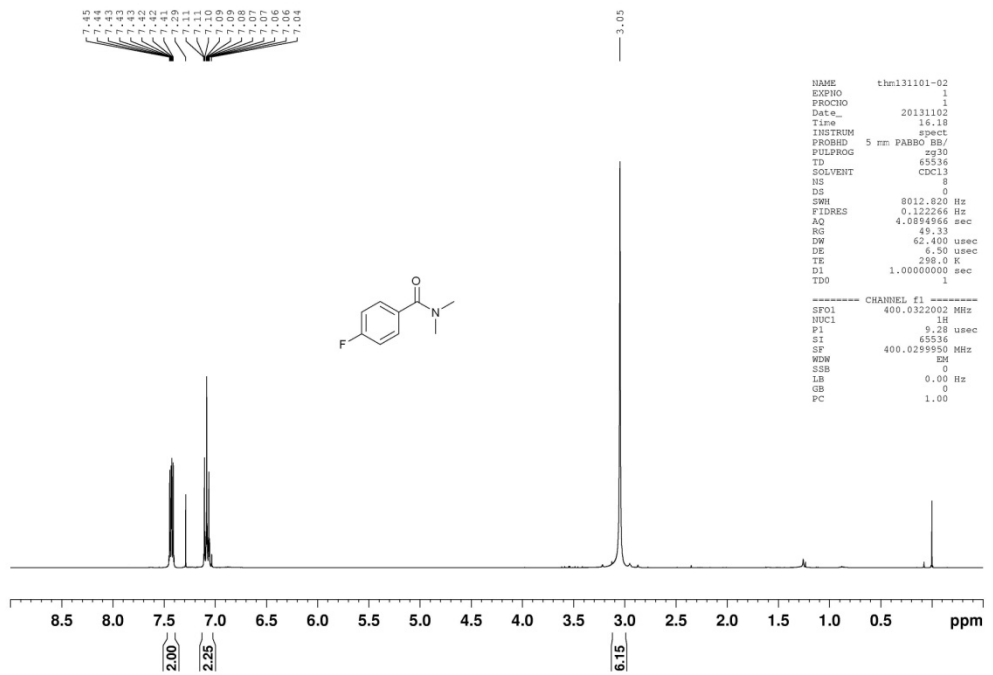

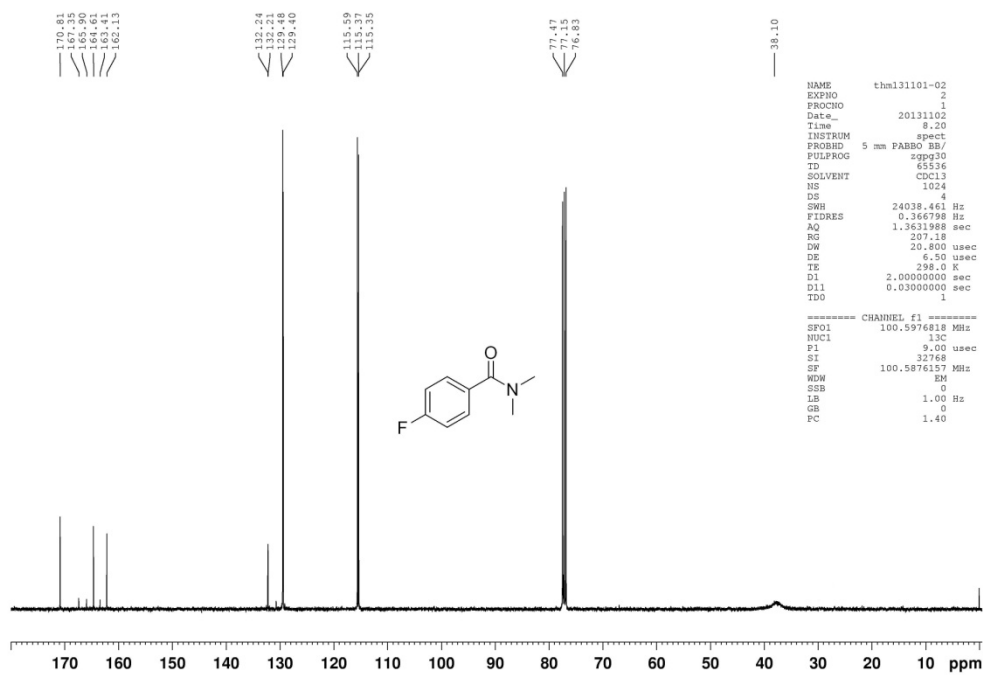

```

NAME      thml31101-02
EXPNO    2
PROCNO   1
Date_    20131102
Time     8.20
INSTRUM  spect
PROBHD   5 mm PABBO BB-
PULPROG  zgpg30
TD       65536
SOLVENT  CDCl3
NS       1024
DS       4
SWH      24038.461 Hz
FIDRES   0.366798 Hz
AQ       1.3631988 sec
RG       207.18
DW       20.800 usec
DE       6.50 usec
TE       298.0 K
D1       2.0000000 sec
D11      0.0300000 sec
TDO      1
===== CHANNEL f1 =====
SF01     100.597618 MHz
NUC1     13C
P1       9.00 usec
SI       32768
SF       100.5876157 MHz
WDW      EM
SSB      0
LB       1.00 Hz
GB       0
PC       1.40
  
```

$^1\text{H}$  NMR,  $^{13}\text{C}$  NMR of 3ha:

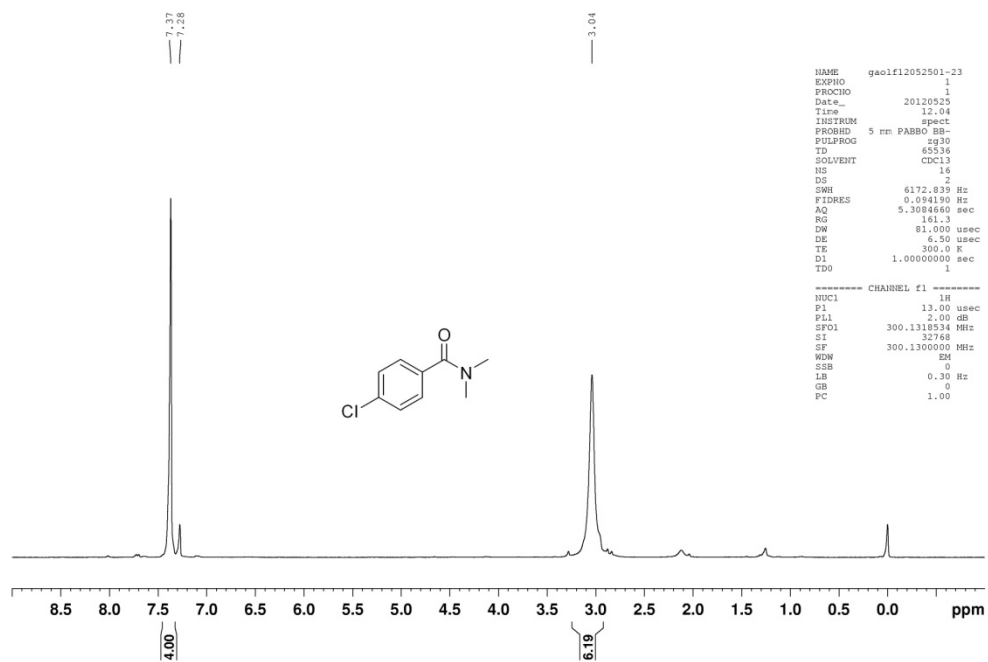

```

NAME      gaolf12052501-23
EXPNO    1
PROCNO   1
Date_    20120525
Time     12.04
INSTRUM  spect
PROBHD   5 mm PABBO BB-
PULPROG  zg30
TD       65536
SOLVENT  CDCl3
NS       16
DS       2
SWH      6172.839 Hz
FIDRES   0.034189 Hz
AQ       5.3084660 sec
RG       161.3
DW       81.000 usec
DE       6.50 usec
TE       300.0 K
D1       1.0000000 sec
TDO      1
===== CHANNEL f1 =====
NUC1     1H
P1       13.00 usec
PL1     2.00 dB
SF01     300.1318934 MHz
SI       32768
SF       300.1300000 MHz
WDW      EM
SSB      0
LB       0.30 Hz
GB       0
PC       1.00
  
```

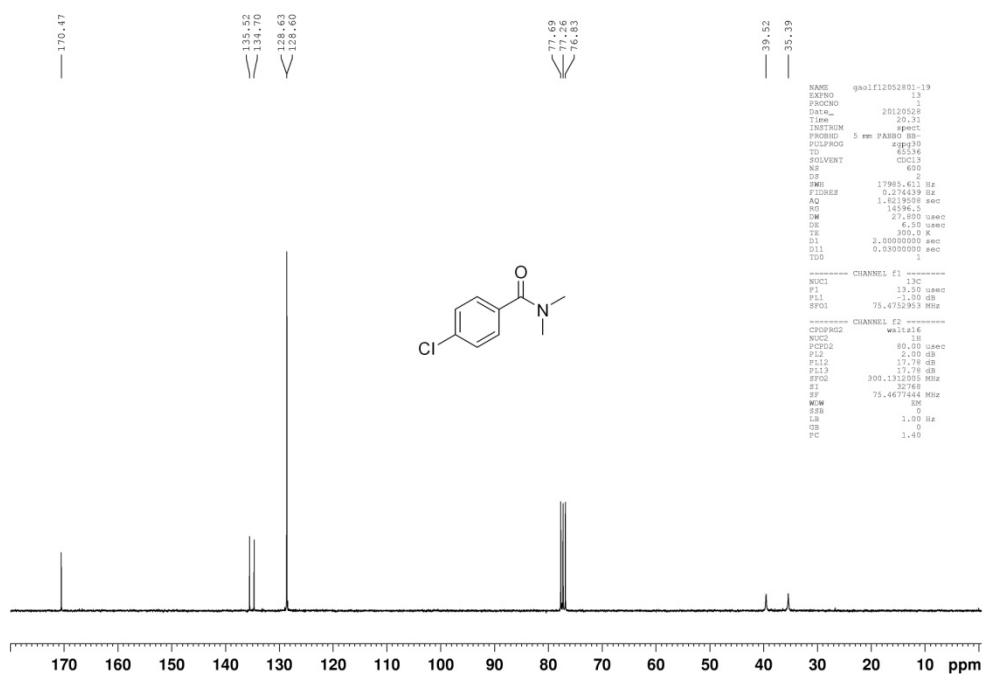

<sup>1</sup>H NMR, <sup>13</sup>C NMR of 3ia:

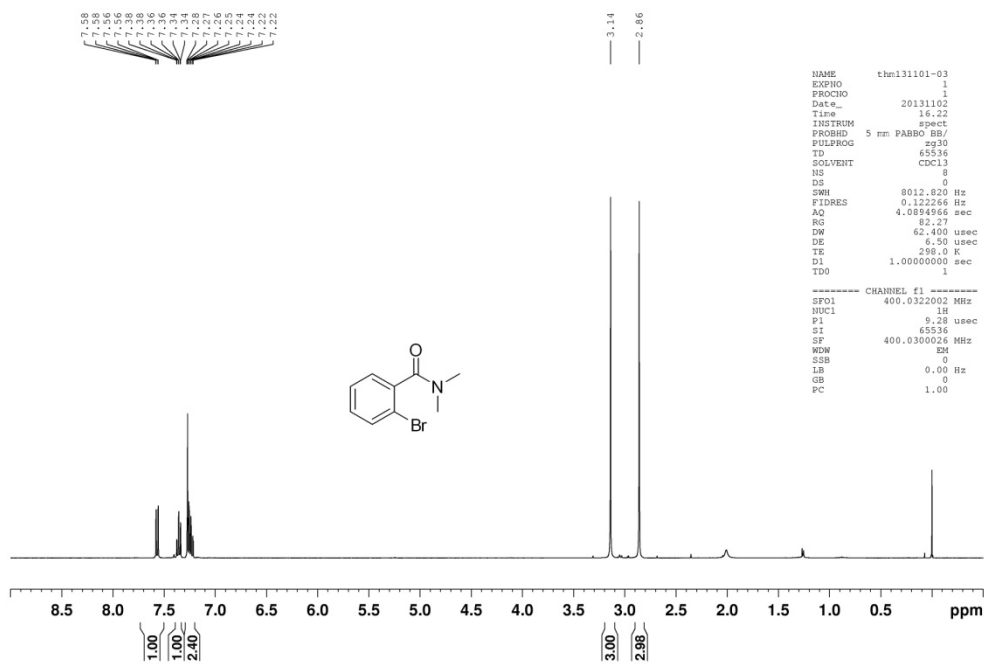

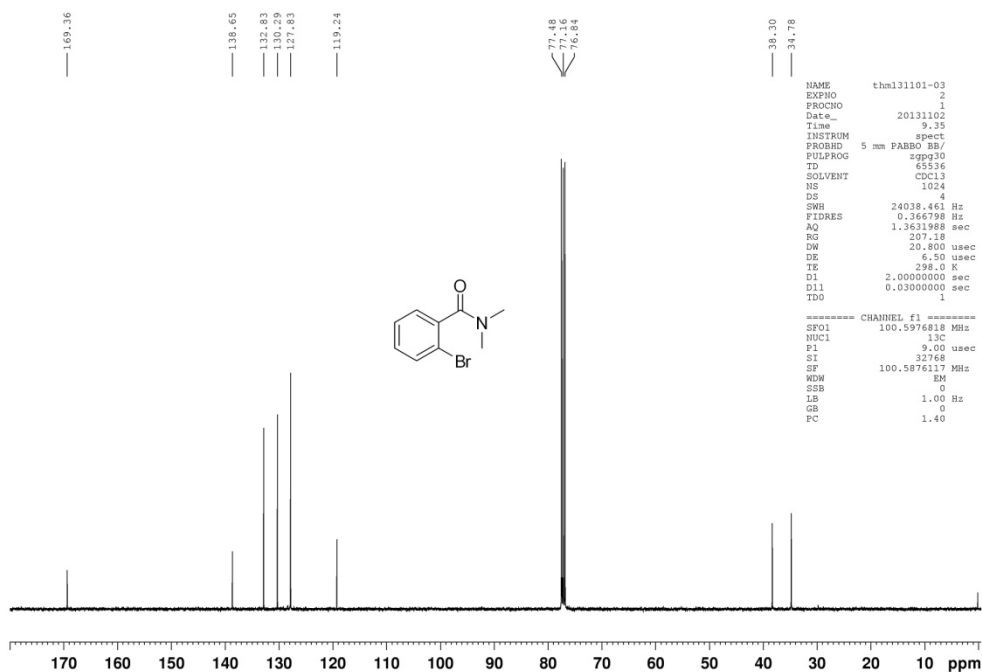

<sup>1</sup>H NMR, <sup>13</sup>C NMR of 3ja:

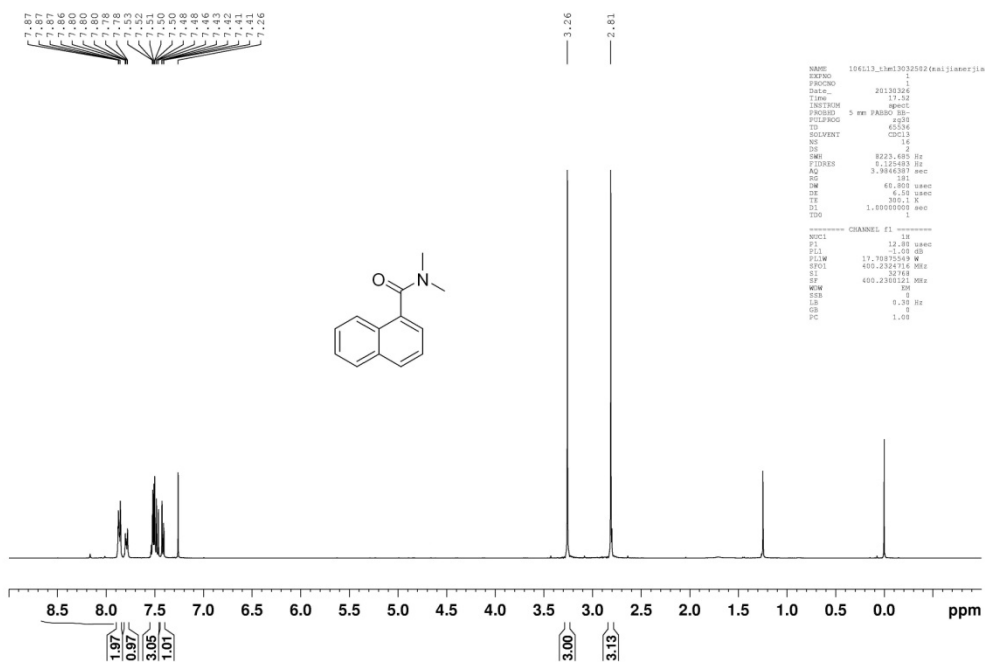

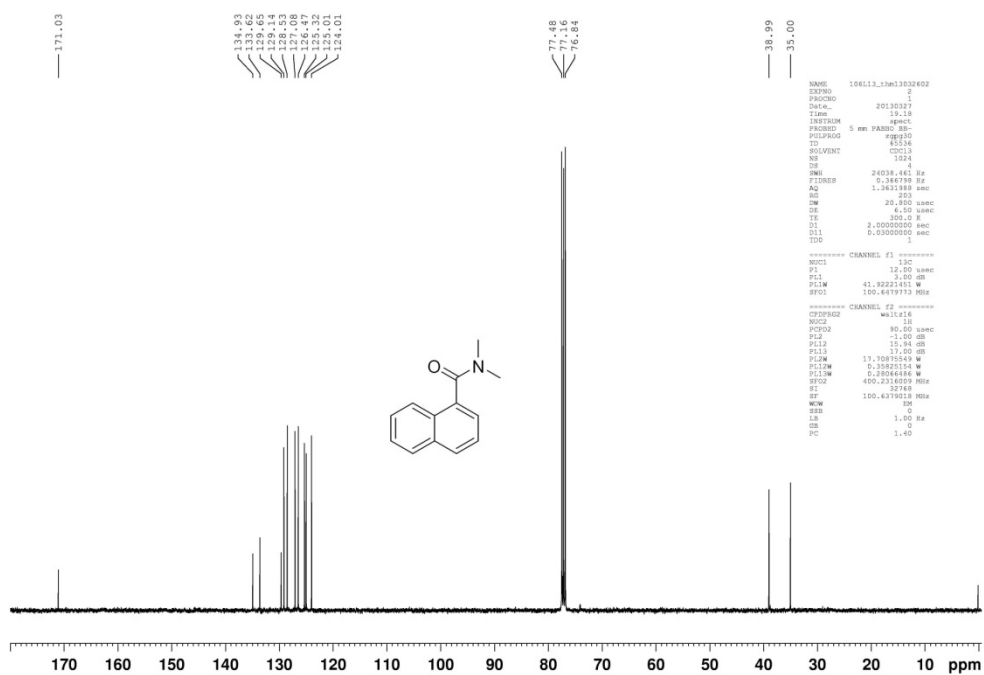

<sup>1</sup>H NMR, <sup>13</sup>C NMR of 3ka:

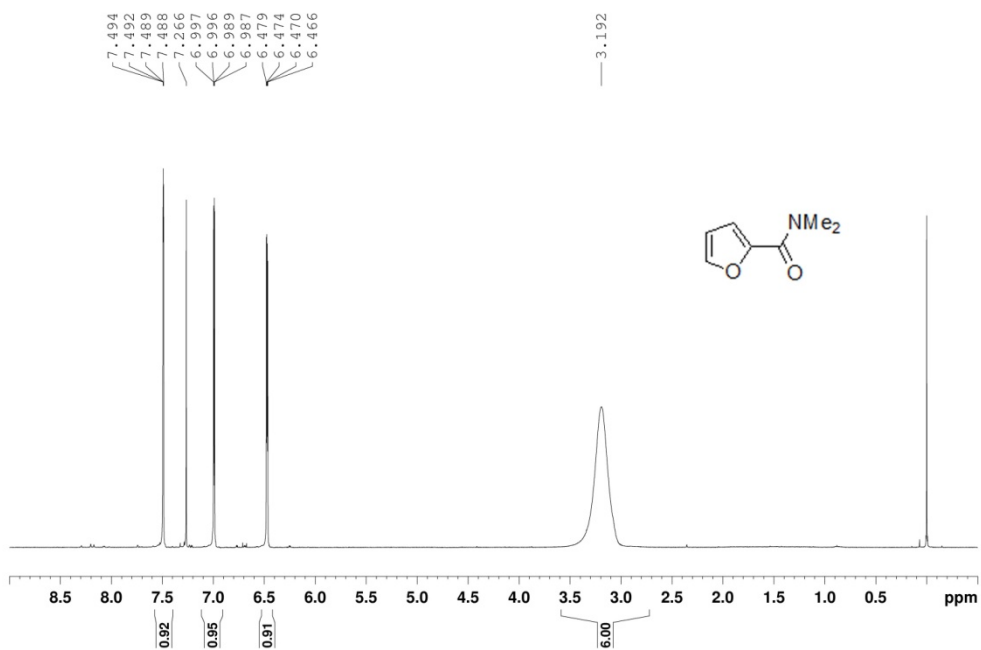

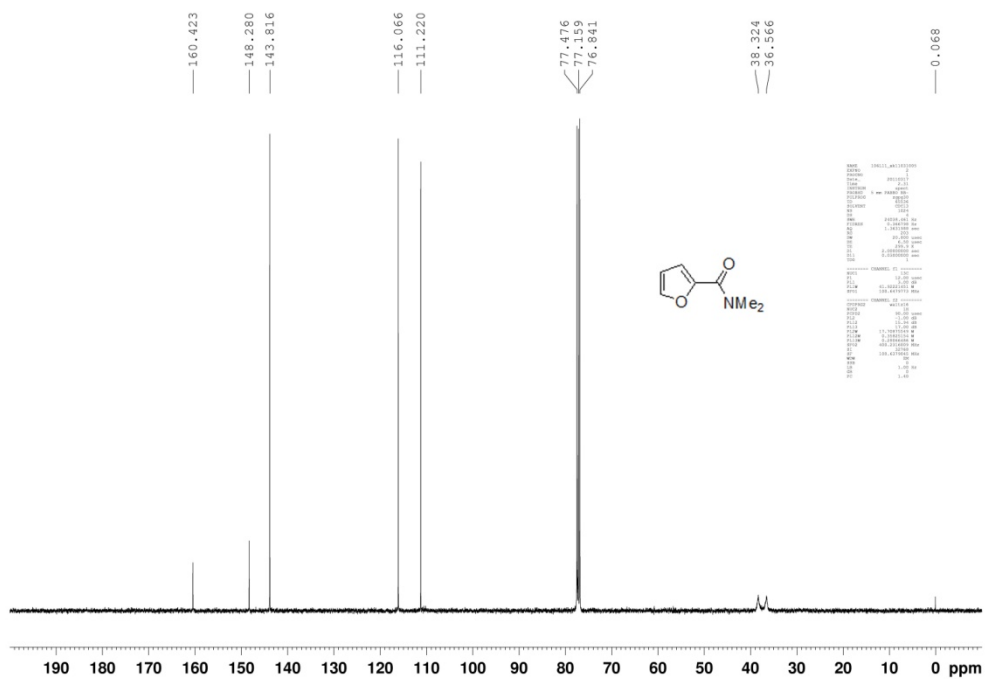

<sup>1</sup>H NMR, <sup>13</sup>C NMR of 3la:

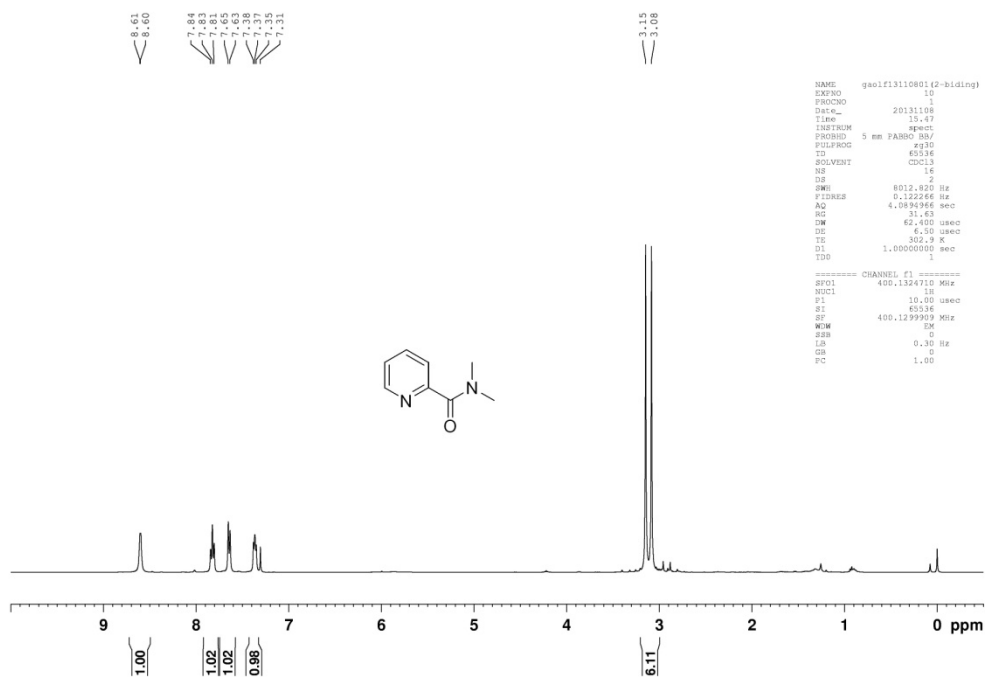

```

NAME   gaelf13110801(2-blding)
EXPNO   10
PROCNO   1
Date_   20131108
Time    15.47
INSTRUM spect
PROBHD  5 mm PARO BBI/
PULPROG zg30
ID      65516
SOLVENT DMS-d6
NS      16
DS      2
SWH     8012.820 Hz
FIDRES  0.132266 Hz
AQ      4.0894966 sec
RG      31.63
DM      62.400 usec
DC      6.50 usec
TE      302.9 K
D1      1.0000000 sec
TD      1

===== CHANNEL f1 =====
SF01   400.1324710 MHz
NUC1    1H
P1      10.00 usec
PI      65516
SF      400.1299909 MHz
WDM     DM
PDB     0
GB      0
PC      1.00

```

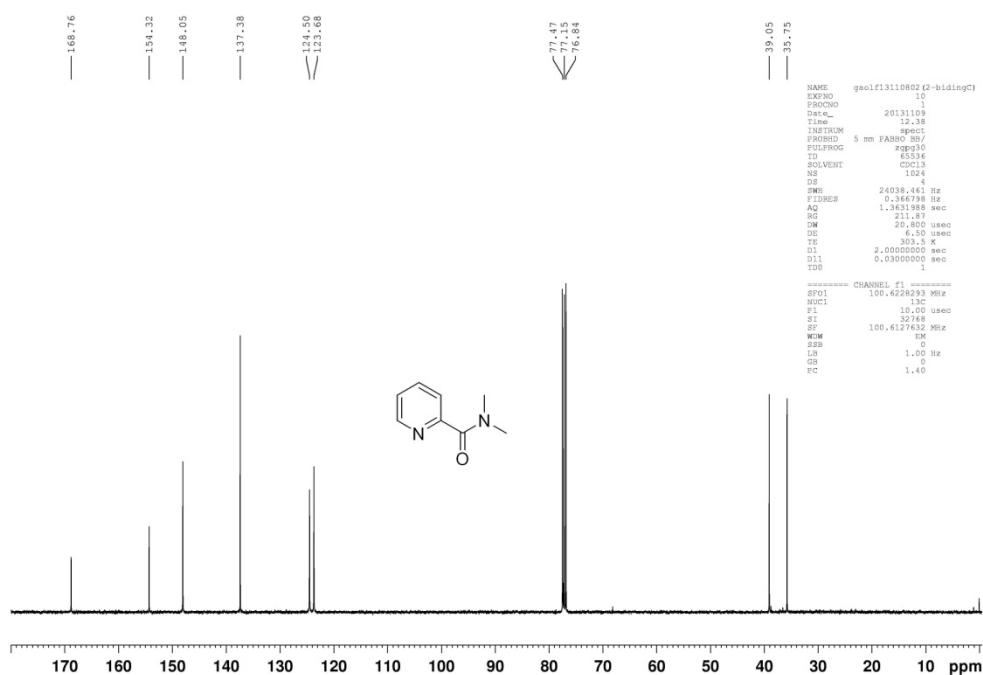

<sup>1</sup>H NMR, <sup>13</sup>C NMR of 3ma:

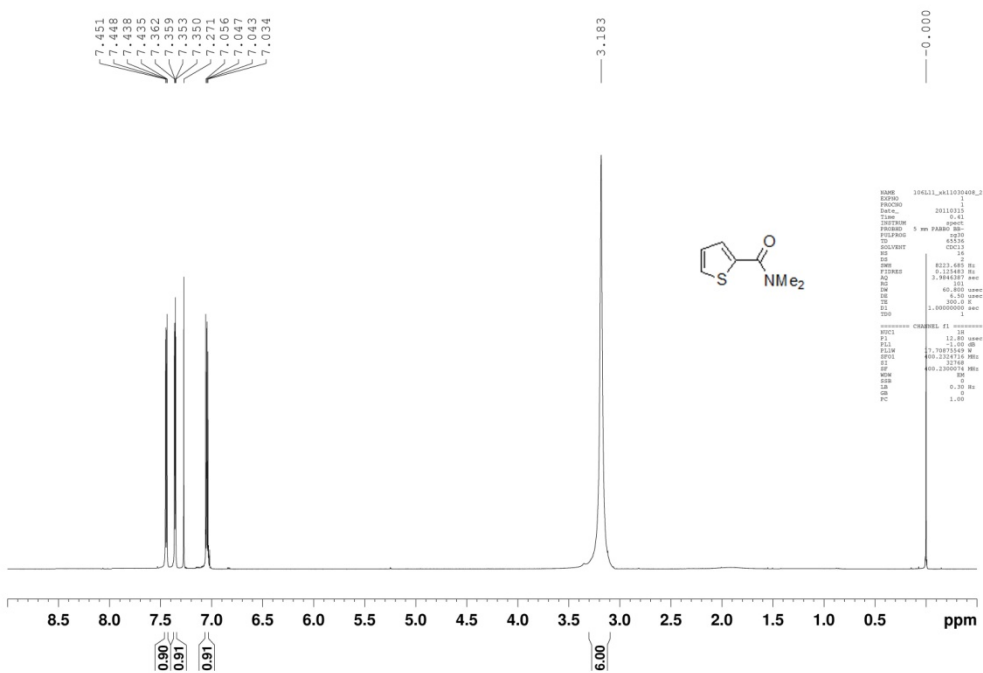





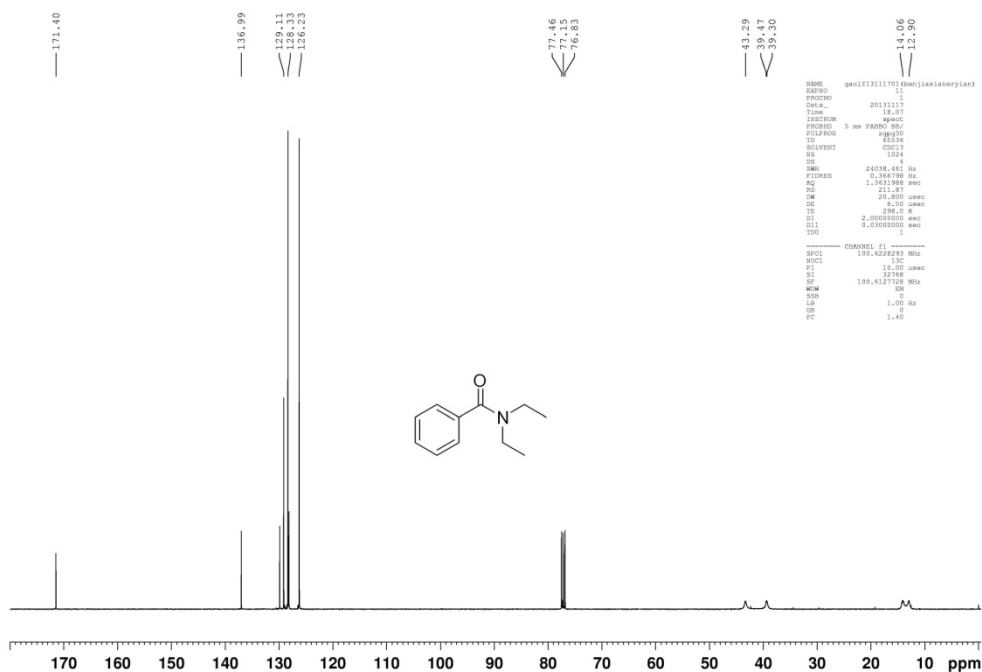

```

NAME      gaolf1311101 (benzamide)
EXPNO     11
PROCNO    1
Date_     2011117
Time      14:07
INSTRUM   spect
PROBHD    5 mm PABBO BB/
PULPROG   zgpg30
ID         45214
SOLVENT   CDCl3
SOLVENT2
NS         1024
DS         4
SWH        24030.441 Hz
FIDRES     0.368788 Hz
AQ         1.941388 sec
RG         211.80
DM         21.80 usec
DE         6.50 usec
TE         300.2 K
D1         2.0000000 sec
SFO1       101.628293 MHz
PC         1.40
  
```

```

----- CHANNEL f1 -----
SFO1       101.628293 MHz
PC         1.40
  
```

**<sup>1</sup>H NMR, <sup>13</sup>C NMR of 3a0:**

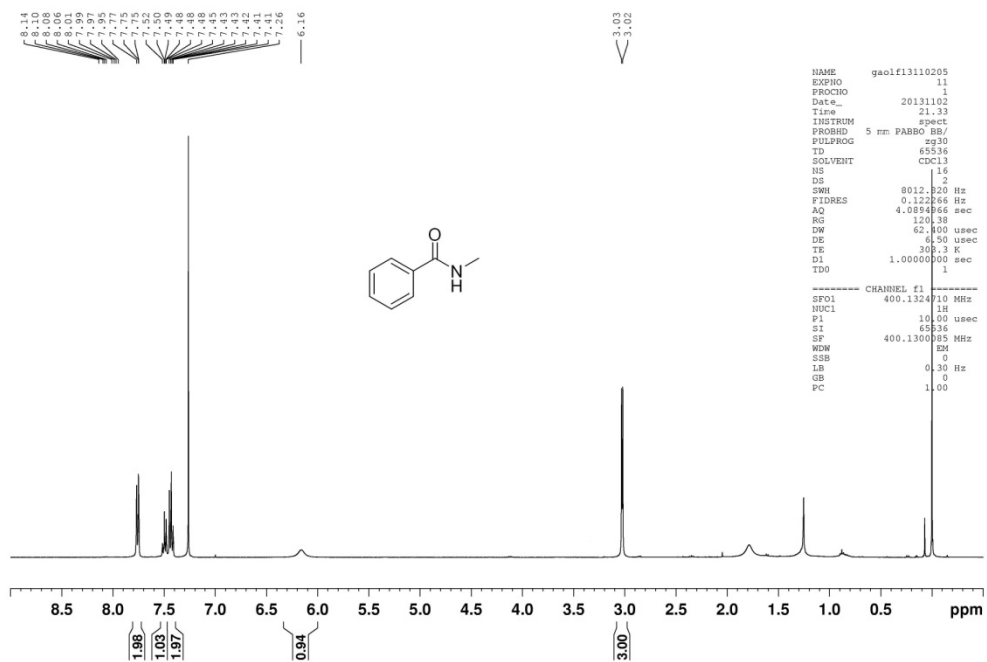

```

NAME      gaolf13110205
EXPNO     11
PROCNO    1
Date_     20111102
Time      21:33
INSTRUM   spect
PROBHD    5 mm PABBO BB/
PULPROG   zg30
TD         65536
SOLVENT   CDCl3
SOLVENT2
NS         16
DS         2
SWH        8012.820 Hz
FIDRES     0.122166 Hz
AQ         4.0894666 sec
RG         120.38
DM         62.400 usec
DE         6.50 usec
TE         300.3 K
D1         1.0000000 sec
SFO1       400.132410 MHz
PC         1.00
  
```

```

----- CHANNEL f1 -----
SFO1       400.132410 MHz
PC         1.00
  
```



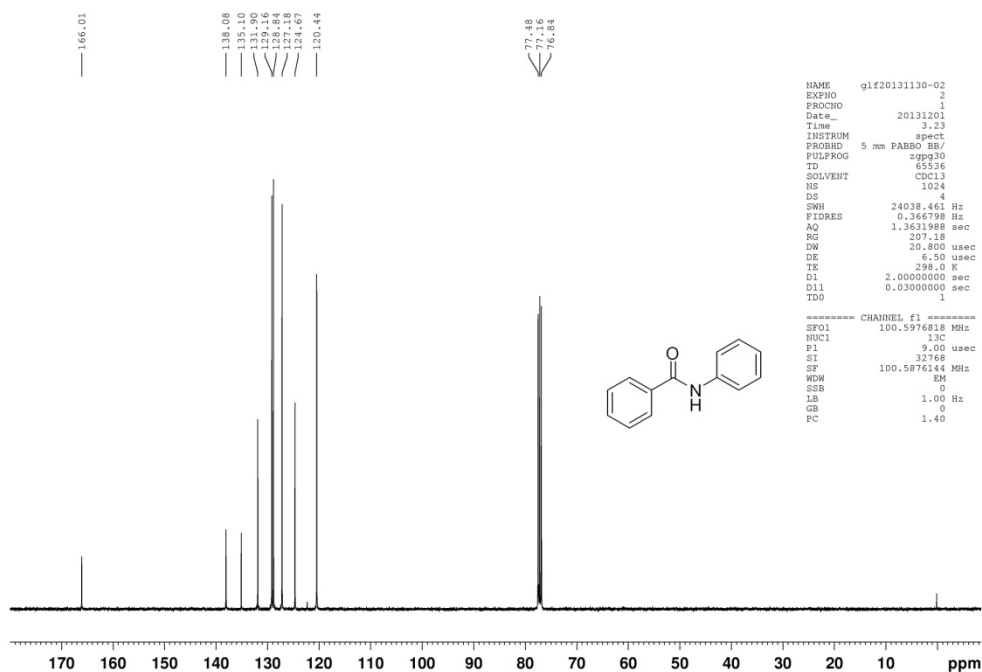

$^1\text{H}$  NMR,  $^{13}\text{C}$  NMR of 3aq:

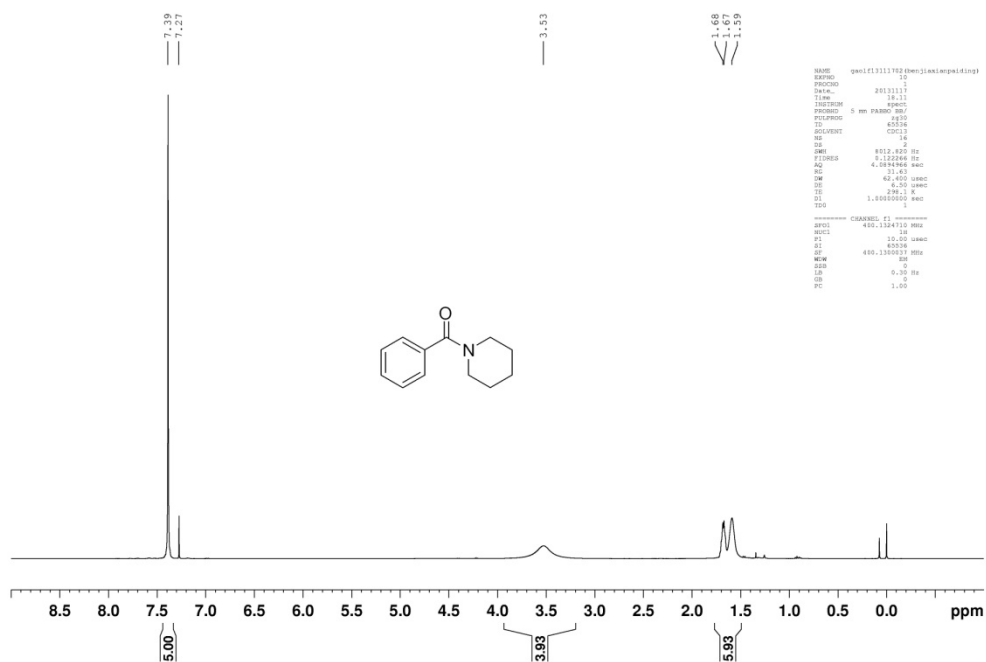

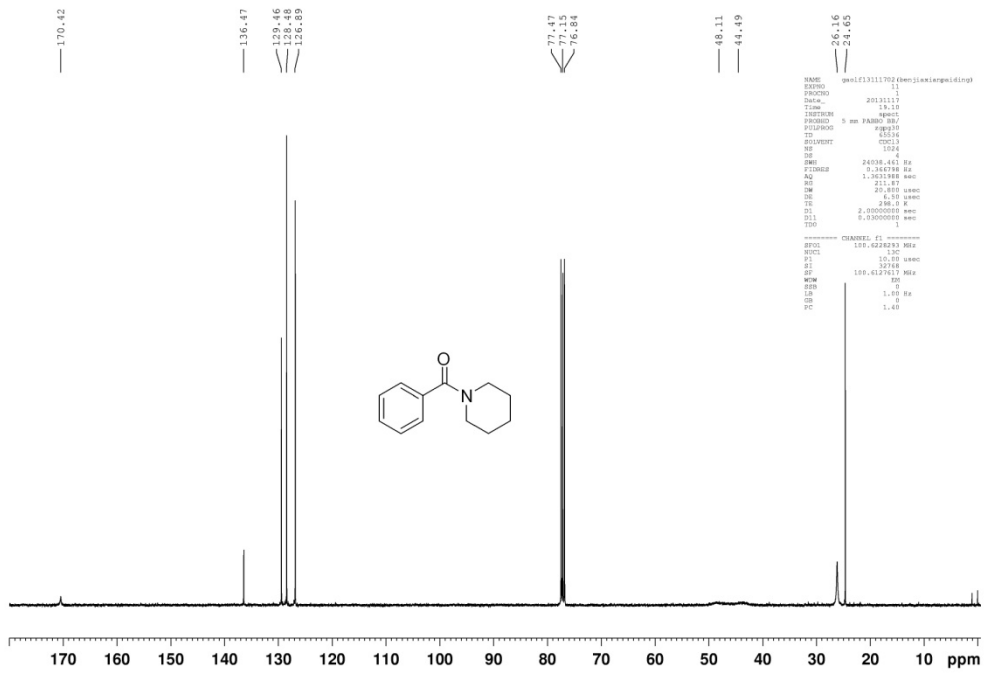

<sup>1</sup>H NMR, <sup>13</sup>C NMR of 3ar:

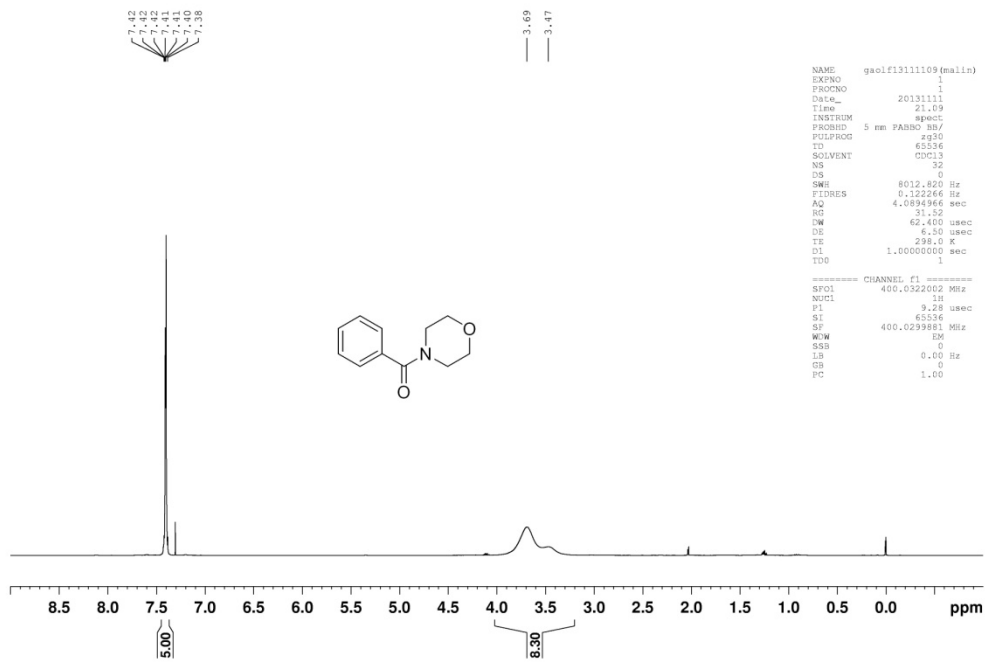

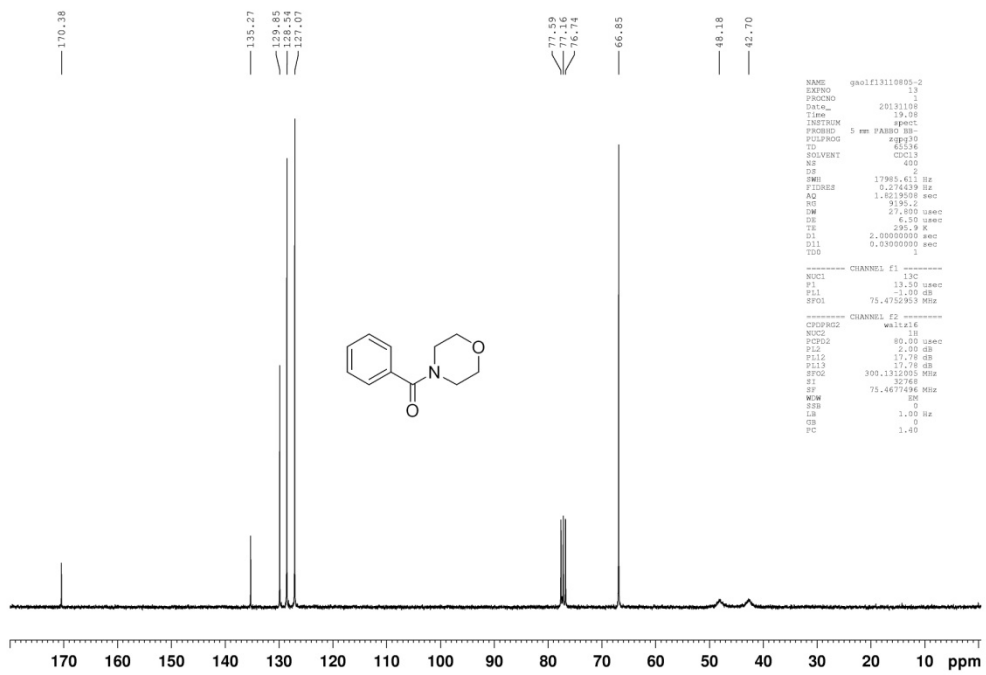

```

NAME      gao1f13110805-2
EXPNO    13
PROCNO   2
Date_    20131109
Time     13.08
INSTRUM  spect
PROBHD   5 mm PABBO BB-
PULPROG  zgpg30
TD        65536
SOLVENT  CDCl3
NS        400
DS        2
SWE       17905.615 Hz
FIDRES   0.274439 Hz
AQ        1.6213009 sec
RG         9196.2
DM        21.000 usec
DE        6.50 usec
TE        300.2 K
D1        2.00000000 sec
D11       0.00000000 sec
TD0
----- CHANNEL f1 -----
NUC1      13C
P1        13.00 usec
PL1       -1.00 dB
SFO1      75.4752993 MHz
----- CHANNEL f2 -----
CPCPRG2  waltz16
NUC2      1H
PCPD2    80.00 usec
PL2       2.00 dB
PL12     17.70 dB
PL13     17.70 dB
SFO2     300.1312008 MHz
SI        32768
SF        75.4677496 MHz
WDW       0
SSB       0
LB        1.00 Hz
GB        0
PC        1.40

```
